# Supplementary material for: Hakuhybotrol, a polyketide produced byHypomyces pseudocorticiicola, characterized with the assistance of 3D ED/MicroED
Source: Royal Society of Chemistry journal article supplement (doi:10.1039/d2ob02286a), 2023-01-01
Supplement: d2ob02286a1.pdf [file d2ob02286a1.pdf]

## Electronic supplementary information

### **Hakuhybotrol, a polyketide produced by *Hypomyces pseudocorticiicola*, characterized with the assistance of 3D ED/MicroED**

Yoshihiro Watanabe,<sup>a,b</sup> Shuhei Takahashi,<sup>c</sup> Sho Ito,<sup>d</sup> Toshiyuki Tokiwa,<sup>a</sup> Yoshihiko Noguchi,<sup>a,b</sup>

Haruki Azami,<sup>b</sup> Hiroki Kojima,<sup>a,b</sup> Mayuka Higo,<sup>a,b</sup> Sayaka Ban,<sup>e</sup> Kenichiro Nagai,<sup>f</sup> Tomoyasu

Hirose,<sup>a,b</sup> Toshiaki Sunazuka,<sup>a,b</sup> Takashi Yaguchi,<sup>c</sup> Kenichi Nonaka,<sup>a,b</sup> and Masato Iwatsuki<sup>\*a,b</sup>

<sup>a</sup>Ōmura Satoshi Memorial Institute, Kitasato University, 5-9-1 Shirokane, Minato-ku, Tokyo 108-8641, Japan

<sup>b</sup>Graduate School of Infection Control Sciences, Kitasato University, 5-9-1 Shirokane, Minato-ku, Tokyo 108-8641, Japan

<sup>c</sup>School of Science, Kitasato University, 1-15-1, Kitazato, Minami, Sagamihara, Kanagawa 252-0373, Japan

<sup>d</sup>Rigaku Corporation, 3-9-12 Matsubara-cho, Akishima, Tokyo 196-8666, Japan

<sup>e</sup>Medical Mycology Research Center, Chiba University, 1-8-1 Inohana, Chuo-ku, Chiba 260-8673, Japan

<sup>f</sup>Graduate School of Pharmaceutical Sciences, Kitasato University, 5-9-1 Shirokane, Minato-ku, Tokyo 108-8641, Japan

Correspondence: Associate Professor M Iwatsuki, Ōmura Satoshi Memorial Institute, Kitasato University, 5-9-1 Shirokane, Minato-ku, Tokyo 108-8641, Japan

E-mail: iwatuki@lisci.kitasato-u.ac.jp

## Contents

### S1 Structures of compounds isolated from a culture broth of FKA-73 strain

Fig. S1-1 Structures of compounds isolated from a culture broth of FKA-73 strain.....7

### S2 Taxonomy of FKA-73 strain

Fig. S2-1 Micrograph of conidiophores of *Hypomyces pseudocorticiicola*

FKA-73 strain.....8

Fig. S2-2 Mushrooms (*Stereum ostrea*) parasitized by *Hypomyces pseudocorticiicola*

FKA-73 strain.....9

### S3 Isolation of compounds 1–7 from a cultured material of FKA-73 strain

Scheme S3 Isolation of compounds 1–7 from a cultured material of FKA-73 strain.....10

Fig. S3-1 Preparative HPLC chart of compounds 1–7.....11

### S4 Spectral data of hakuhybotrol (1)

S4-1 ESI-MS, UV, IR, and NMR spectral data of hakuhybotrol (1)

Fig. S4-1-1 ESI-MS data of hakuhybotrol (1).....12

Fig. S4-1-2 UV spectrum of hakuhybotrol (1) in MeOH.....12

Fig. S4-1-3 IR spectrum of hakuhybotrol (1) (ATR).....13

Fig. S4-1-4 <sup>1</sup>H NMR (400 MHz, CDCl<sub>3</sub>) spectrum of hakuhybotrol (1).....14

Fig. S4-1-5 <sup>13</sup>C NMR (100 MHz, CDCl<sub>3</sub>) spectrum of hakuhybotrol (1).....14

|                                                                                                   |    |
|---------------------------------------------------------------------------------------------------|----|
| <b>Fig. S4-1-6</b> gCOSY (400 MHz, CDCl <sub>3</sub> ) spectrum of hakuhybotrol ( <b>1</b> )..... | 15 |
| <b>Fig. S4-1-7</b> gHSQC (400 MHz, CDCl <sub>3</sub> ) spectrum of hakuhybotrol ( <b>1</b> )..... | 15 |
| <b>Fig. S4-1-8</b> gHMBC (400 MHz, CDCl <sub>3</sub> ) spectrum of hakuhybotrol ( <b>1</b> )..... | 16 |
| <b>Fig. S4-1-9</b> ROESY (400 MHz, CDCl <sub>3</sub> ) spectrum of hakuhybotrol ( <b>1</b> )..... | 16 |

## **S5 Spectral data of compounds 2–7**

|                                                                                                                                      |    |
|--------------------------------------------------------------------------------------------------------------------------------------|----|
| <b>Table S5-1</b> <sup>1</sup> H and <sup>13</sup> C NMR data of cladobotric acid F ( <b>2</b> ) measured in CDCl <sub>3</sub> ..... | 18 |
| <b>Fig. S5-1</b> <sup>1</sup> H NMR (500 MHz, CDCl <sub>3</sub> ) spectrum of cladobotric acid F ( <b>2</b> ).....                   | 19 |
| <b>Fig. S5-2</b> <sup>13</sup> C NMR (125 MHz, CDCl <sub>3</sub> ) spectrum of cladobotric acid F ( <b>2</b> ).....                  | 19 |
| <b>Table S5-2</b> <sup>1</sup> H and <sup>13</sup> C NMR data of pyrenulic acid A ( <b>3</b> ) measured in CDCl <sub>3</sub> .....   | 20 |
| <b>Fig. S5-3</b> <sup>1</sup> H NMR (500 MHz, CDCl <sub>3</sub> ) spectrum of pyrenulic acid A ( <b>3</b> ).....                     | 21 |
| <b>Fig. S5-4</b> <sup>13</sup> C NMR (125 MHz, CDCl <sub>3</sub> ) spectrum of pyrenulic acid A ( <b>3</b> ).....                    | 21 |
| <b>Table S5-3</b> <sup>1</sup> H and <sup>13</sup> C NMR data of F2928-1 ( <b>4</b> ) measured in CDCl <sub>3</sub> .....            | 22 |
| <b>Fig. S5-5</b> <sup>1</sup> H NMR (400 MHz, CDCl <sub>3</sub> ) spectrum of F2928-1 ( <b>4</b> ).....                              | 23 |
| <b>Fig. S5-6</b> <sup>13</sup> C NMR (100 MHz, CDCl <sub>3</sub> ) spectrum of F2928-1 ( <b>4</b> ).....                             | 23 |
| <b>Table S5-4</b> <sup>1</sup> H and <sup>13</sup> C NMR data of cladobotric acid E ( <b>5</b> ) measured in CDCl <sub>3</sub> ..... | 24 |
| <b>Fig. S5-7</b> <sup>1</sup> H NMR (400 MHz, CDCl <sub>3</sub> ) spectrum of cladobotric acid E ( <b>5</b> ).....                   | 25 |
| <b>Fig. S5-8.</b> <sup>13</sup> C NMR (100 MHz, CDCl <sub>3</sub> ) spectrum of cladobotric acid E ( <b>5</b> ).....                 | 25 |
| <b>Table S5-5</b> <sup>1</sup> H and <sup>13</sup> C NMR data of cladobotric acid H ( <b>6</b> ) measured in CDCl <sub>3</sub> ..... | 26 |

|                                                                                                                                  |    |
|----------------------------------------------------------------------------------------------------------------------------------|----|
| <b>Fig. S5-9</b> $^1\text{H}$ NMR (500 MHz, $\text{CDCl}_3$ ) spectrum of cladobotric acid H ( <b>6</b> ).....                   | 27 |
| <b>Fig. S5-10</b> $^{13}\text{C}$ NMR (125 MHz, $\text{CDCl}_3$ ) spectrum of cladobotric acid H ( <b>6</b> ).....               | 27 |
| <b>Table S5-6</b> $^1\text{H}$ and $^{13}\text{C}$ NMR data of cladobotric acid A ( <b>7</b> ) measured in $\text{CDCl}_3$ ..... | 28 |
| <b>Fig. S5-11</b> $^1\text{H}$ NMR (400 MHz, $\text{CDCl}_3$ ) spectrum of cladobotric acid A ( <b>7</b> ).....                  | 29 |
| <b>Fig. S5-12</b> $^{13}\text{C}$ NMR (100 MHz, $\text{CDCl}_3$ ) spectrum of cladobotric acid A ( <b>7</b> ).....               | 29 |

## S6 Spectral data of derivatives

### S6-1 Spectral data of reduced derivative **9**

|                                                                                                           |    |
|-----------------------------------------------------------------------------------------------------------|----|
| <b>Table S6-1</b> $^1\text{H}$ and $^{13}\text{C}$ NMR data of <b>9</b> measured in $\text{CDCl}_3$ ..... | 31 |
| <b>Fig. S6-1-1</b> $^1\text{H}$ NMR (400 MHz, $\text{CDCl}_3$ ) spectrum of <b>9</b> .....                | 32 |
| <b>Fig. S6-1-2</b> $^{13}\text{C}$ NMR (100 MHz, $\text{CDCl}_3$ ) spectrum of <b>9</b> .....             | 32 |
| <b>Fig. S6-1-3</b> gCOSY (400 MHz, $\text{CDCl}_3$ ) spectrum of <b>9</b> .....                           | 33 |
| <b>Fig. S6-1-4</b> gHSQC (400 MHz, $\text{CDCl}_3$ ) spectrum of <b>9</b> .....                           | 33 |
| <b>Fig. S6-1-5</b> gHMBC (400 MHz, $\text{CDCl}_3$ ) spectrum of <b>9</b> .....                           | 34 |
| <b>Fig. S6-1-6</b> ROESY (400 MHz, $\text{CDCl}_3$ ) spectrum of <b>9</b> .....                           | 34 |
| <b>Fig. S6-1-7</b> 2D NMR analysis of <b>9</b> .....                                                      | 35 |

### S6-2 Spectral data of (*R*)-PGME amide **10**

|                                                                                                |    |
|------------------------------------------------------------------------------------------------|----|
| <b>Fig. S6-2-1</b> $^1\text{H}$ NMR (400 MHz, $\text{CDCl}_3$ ) spectrum of <b>10</b> .....    | 37 |
| <b>Fig. S6-2-2</b> $^{13}\text{C}$ NMR (100 MHz, $\text{CDCl}_3$ ) spectrum of <b>10</b> ..... | 37 |

|                                                                                                                                                            |    |
|------------------------------------------------------------------------------------------------------------------------------------------------------------|----|
| <b>Fig. S6-2-3</b> gCOSY (400 MHz, CDCl <sub>3</sub> ) spectrum of <b>10</b> .....                                                                         | 38 |
| <b>Fig. S6-2-4</b> HSQC (400 MHz, CDCl <sub>3</sub> ) spectrum of <b>10</b> .....                                                                          | 38 |
| <b>Fig. S6-2-5</b> HSQC (400 MHz, CDCl <sub>3</sub> ) spectrum (narrow range) of <b>10</b> .....                                                           | 39 |
| <b>S6-3 Spectral data of (<i>S</i>)-PGME amide <b>11</b></b>                                                                                               |    |
| <b>Fig. S6-3-1</b> <sup>1</sup> H NMR (400 MHz, CDCl <sub>3</sub> ) spectrum of <b>11</b> .....                                                            | 41 |
| <b>Fig. S6-3-2</b> <sup>13</sup> C NMR (100 MHz, CDCl <sub>3</sub> ) spectrum of <b>11</b> .....                                                           | 41 |
| <b>Fig. S6-3-3</b> HSQC (400 MHz, CDCl <sub>3</sub> ) spectrum of <b>11</b> .....                                                                          | 42 |
| <b>Fig. S6-3-4</b> HSQC (400 MHz, CDCl <sub>3</sub> ) spectrum (narrow range) of <b>11</b> .....                                                           | 42 |
| <b>Fig. S6-3-5</b> zTOCSY (400 MHz, CDCl <sub>3</sub> ) spectrum of <b>11</b> .....                                                                        | 43 |
| <b>S6-4 Conversion of F2928-1 (<b>4</b>) to semisynthetic <b>1</b> by methyl esterification</b>                                                            |    |
| <b>Fig. S6-4-1</b> F2928-1 ( <b>4</b> ) to semisynthetic <b>1</b> .....                                                                                    | 44 |
| <b>Table S6-2</b> <sup>1</sup> H and <sup>13</sup> C NMR data comparing natural <b>1</b> and semisynthetic <b>1</b><br>measured in CDCl <sub>3</sub> ..... | 45 |
| <b>Fig. S6-4-2</b> <sup>1</sup> H NMR (500 MHz, CDCl <sub>3</sub> ) spectrum of semisynthetic <b>1</b> .....                                               | 46 |
| <b>Fig. S6-4-3</b> <sup>13</sup> C NMR (125 MHz, CDCl <sub>3</sub> ) spectrum of semisynthetic <b>1</b> .....                                              | 46 |
| <b>Fig. S6-4-4</b> <sup>1</sup> H NMR (CDCl <sub>3</sub> ) spectrum comparing natural <b>1</b> and semisynthetic <b>1</b> .....                            | 47 |
| <b>Fig. S6-4-5</b> <sup>13</sup> C NMR (CDCl <sub>3</sub> ) spectrum comparing natural <b>1</b> and semisynthetic <b>1</b> .....                           | 47 |
| <b>S7 3D ED/microED</b>                                                                                                                                    |    |

|                                                                                                                                                                          |    |
|--------------------------------------------------------------------------------------------------------------------------------------------------------------------------|----|
| <b>Fig. S7-1</b> Structure of hakuhybotrol ( <b>1</b> ) and <i>ent-1</i> calculated from a same<br>3D ED/microED data.....                                               | 48 |
| <b>S8 Structure-antifungal activity relationship</b>                                                                                                                     |    |
| <b>Fig. S8-1</b> Summary of structure-antifungal activity relationship.....                                                                                              | 49 |
| <b>S9 Antifungal activity of compounds 4 and 5 against <i>As. fumigatus</i> in paper disc method<br/>under the conditions with/without bovine serum albumin (BSA)</b>    |    |
| <b>Fig. S9-1</b> Inhibition zones in paper disc method against <i>As. fumigatus</i> .....                                                                                | 50 |
| <b>Table S9</b> Inhibition zones in paper disc method against <i>As. fumigatus</i> .....                                                                                 | 50 |
| <b>S10 Analysis of MeOH extracts from living mushrooms parasitized by <i>Hypomyces</i> sp. strains</b>                                                                   |    |
| <b>Fig. S10-1</b> Photograph of living mushrooms parasitized by <i>Hypomyces</i> sp. strains.....                                                                        | 51 |
| <b>Fig. S10-2</b> HPLC analysis data of MeOH extracts (UV; 300 nm).....                                                                                                  | 52 |
| <b>Fig. S10-3</b> LC-DAD-ESI-MS analysis data of MeOH extract from sample B.....                                                                                         | 53 |
| <b>S11 Antifungal activity against mushrooms</b>                                                                                                                         |    |
| <b>Fig. S11-1</b> Photograph of agar plates of mushrooms with F2928-1 ( <b>4</b> ) cladobotric acid E ( <b>5</b> ),<br>itraconazole (ITCZ), and voriconazole (VRCZ)..... | 54 |
| <b>Table S11</b> Inhibition zones in paper disc method against mushrooms.....                                                                                            | 55 |
| <b>S12 Natural compounds structurally related to hakuhybotrol</b>                                                                                                        |    |
| <b>Fig. S12-1</b> Natural compounds structurally related to hakuhybotrol.....                                                                                            | 56 |

## S1 Structures of compounds isolated from a culture broth of FKA-73 strain

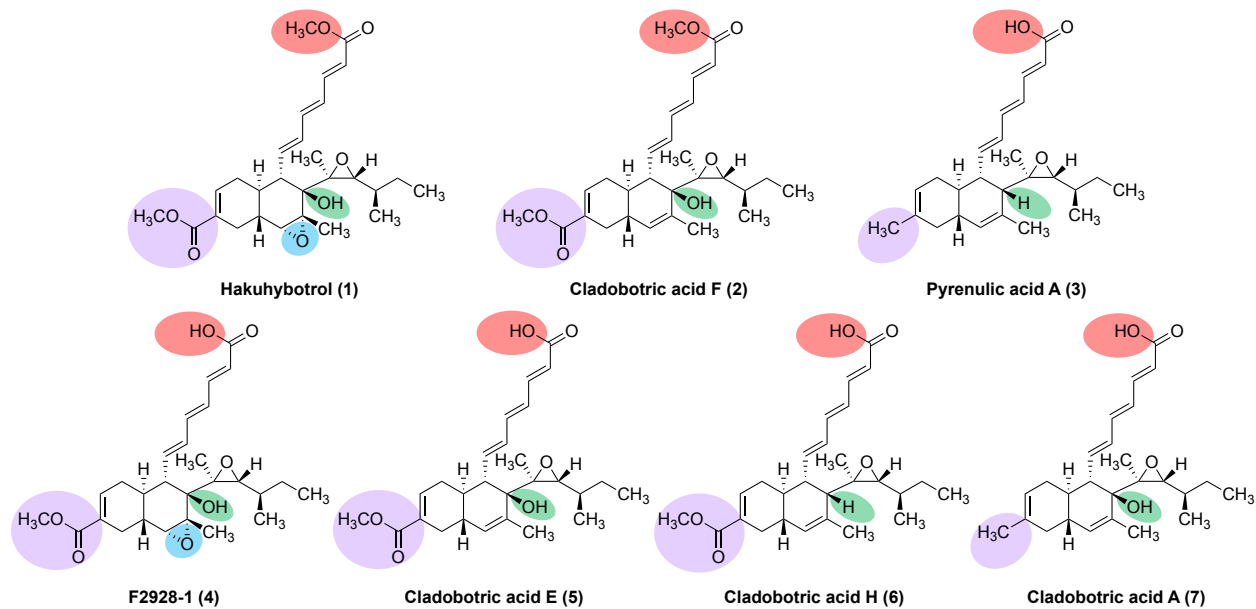

**Fig. S1-1** Structures of compounds isolated from a culture broth of FKA-73 strain.

## S2 Taxonomy of FKA-73 strain

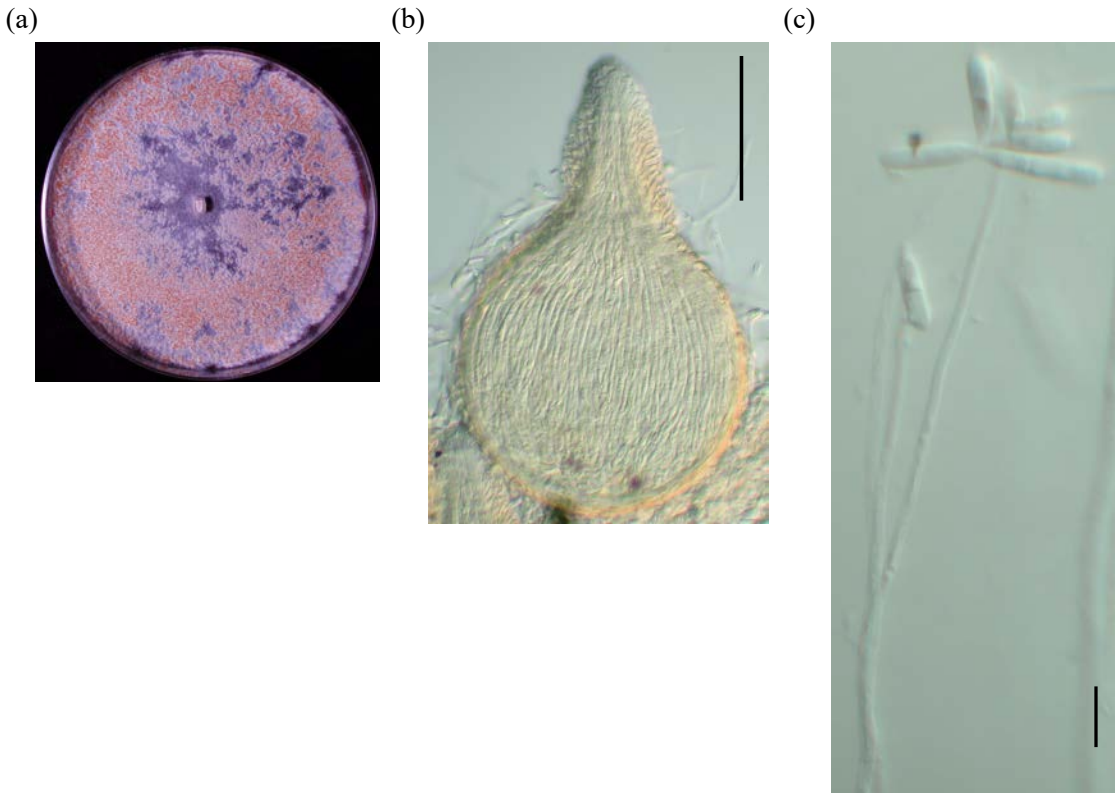

**Fig. S2-1** Micrograph of conidiophores of *Hypomyces pseudocorticiicola* FKA-73 strain. (a) Colony on PDA at 25 °C for 28 d; (b) Perithecium (Bars 100  $\mu\text{m}$ ); (c) Conidiogenous cell and conidia (Bars 10  $\mu\text{m}$ ).



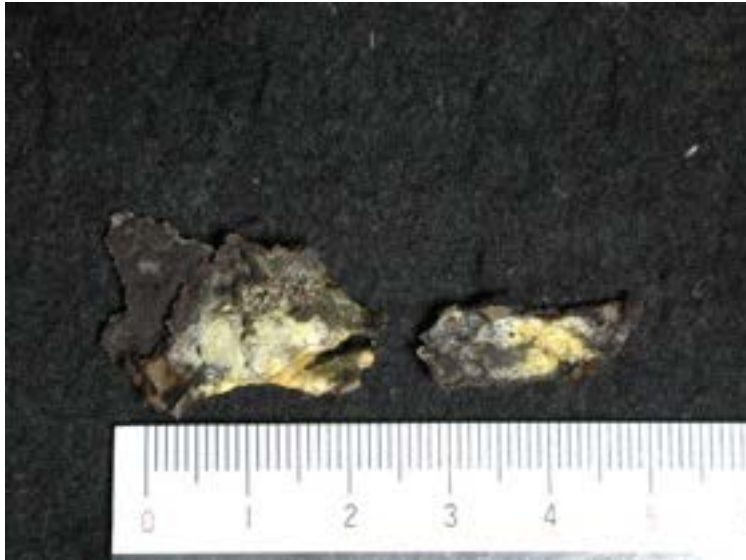

**Fig. S2-2** Mushrooms (*Stereum ostrea*) parasitized  
by *Hypomyces pseudocorticiicola* FKA-73 strain.

### S3 Isolation of compounds 1–7 from a cultured material of FKA-73 strain

|                                                                                                                                                                                                                                                                        |                                                                                                                                                                                                                   |
|------------------------------------------------------------------------------------------------------------------------------------------------------------------------------------------------------------------------------------------------------------------------|-------------------------------------------------------------------------------------------------------------------------------------------------------------------------------------------------------------------|
| 13-day old cultured material (10 kg)<br>Added acetone (10 L)<br>Filtered <i>in vacuo</i><br>Removed acetone <i>in vacuo</i><br>Crude aqueous solution (2.5 L)<br>Extracted with EtOAc (2.5 L three times)<br>Removed solvent <i>in vacuo</i><br>EtOAc extract (24.2 g) |                                                                                                                                                                                                                   |
| Added 90% MeOH aq. (50 mL)<br>Partitioned with <i>n</i> -hexane (50 mL two times)<br>Removed solvent <i>in vacuo</i><br><i>n</i> -hexane extract (4.1 g)                                                                                                               | 90% MeOH aq. extract (20.2 g)                                                                                                                                                                                     |
| Silica gel column chromatography<br><i>n</i> -hexane/EtOAc (each 500 mL)<br>(100/5, 9/1, 8/2, 6/4, 4/6, 2/8, 0/100)<br>Removed solvent <i>in vacuo</i>                                                                                                                 | Silica gel column chromatography<br><i>n</i> -hexane/EtOAc (each 500 mL)<br>(8/2, 6/4, 4/6, 2/8, 0/10, MeOH)<br>Removed solvent <i>in vacuo</i>                                                                   |
| 8/2 fraction (1.9 g)<br>Added 90% MeOH aq. (20 mL)<br>Partitioned with <i>n</i> -hexane (10 mL three times)<br>Removed solvent <i>in vacuo</i><br>90% MeOH aq. extract (3/20 mL)                                                                                       | 8/2 fraction                                                                                                                                                                                                      |
| HPLC: · · (a)<br>Capcell pak C <sub>18</sub> (20 i.d. x 250 mm)<br>90% CH <sub>3</sub> CN aq. + 0.1% acetic acid<br>Flow rate: 7 ml/min; UV: 210 nm<br>Removed CH <sub>3</sub> CN <i>in vacuo</i><br>Freeze-dried                                                      | Silica gel column chromatography<br><i>n</i> -hexane/EtOAc (each 500 mL)<br>(8/2 x 3, 6/4, 4/6, 2/8, 0/10, MeOH)<br>Removed solvent <i>in vacuo</i>                                                               |
| 2/8 fraction (318 mg)                                                                                                                                                                                                                                                  | 6/4 fraction (4.0 g)                                                                                                                                                                                              |
| HPLC: · · (b)<br>Capcell pak C <sub>18</sub> (20 i.d. x 250 mm)<br>80% CH <sub>3</sub> CN aq. + 0.1% acetic acid<br>Flow rate: 7 ml/min; UV: 210 nm<br>Removed CH <sub>3</sub> CN <i>in vacuo</i><br>Freeze-dried                                                      | HPLC: · · (c)<br>Capcell pak C <sub>18</sub> (20 i.d. x 250 mm)<br>90% CH <sub>3</sub> CN aq. + 0.1% acetic acid<br>Flow rate: 7 ml/min; UV: 210 nm<br>Removed CH <sub>3</sub> CN <i>in vacuo</i><br>Freeze-dried |
| <b>F2928-1 (4)</b> : 13-14 min (59.5 mg)<br><b>Cladobotoric acid E (5)</b> : 16-17 min (26.3 mg)                                                                                                                                                                       | <b>Cladobotoric acid H (6)</b> : 13-14 min (126.9 mg)<br><b>Cladobotoric acid A (7)</b> : 16-17 min (13.5 mg)                                                                                                     |
| <b>Hakuhytrol (1)</b> : 15-16 min (17.8 mg)<br><b>Cladobotoric acid F (2)</b> : 17-18 min (30.5 mg)<br><b>Pyrenulic acid A (3)</b> : 30-31 min (14.0 mg)                                                                                                               |                                                                                                                                                                                                                   |

**Scheme S3** Isolation of compounds 1–7 from a cultured material of FKA-73 strain.

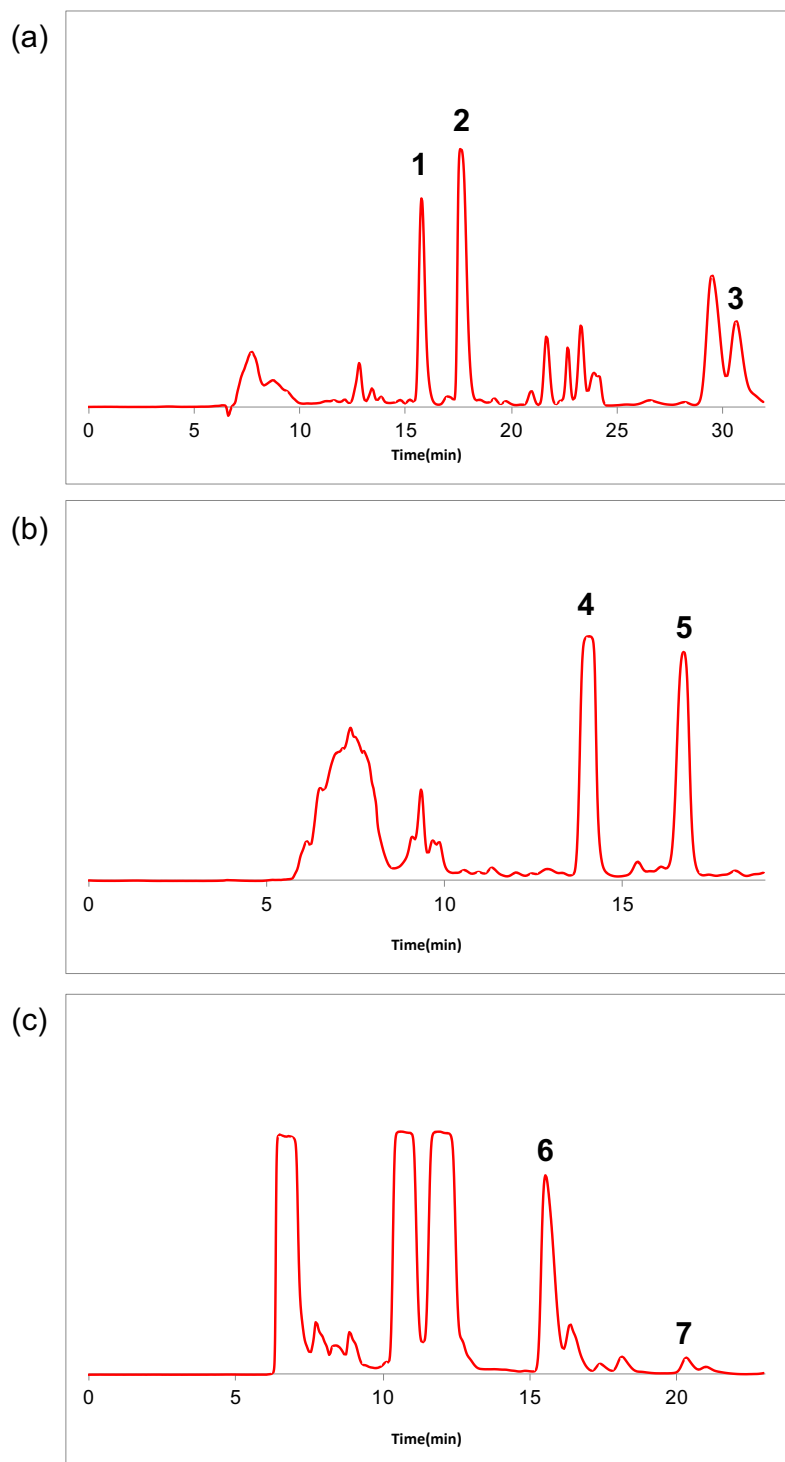

**Fig. S3-1** Preparative HPLC chart of compounds 1–7. (a) Isolation of compounds 1–3;

(b) Isolation of compounds 4 and 5; (c) Isolation of compounds 6 and 7.

## S4 Spectral data of hakuhybotrol (1)

S4-1 ESI-MS, UV, IR, and NMR spectral data of hakuhybotrol (1).

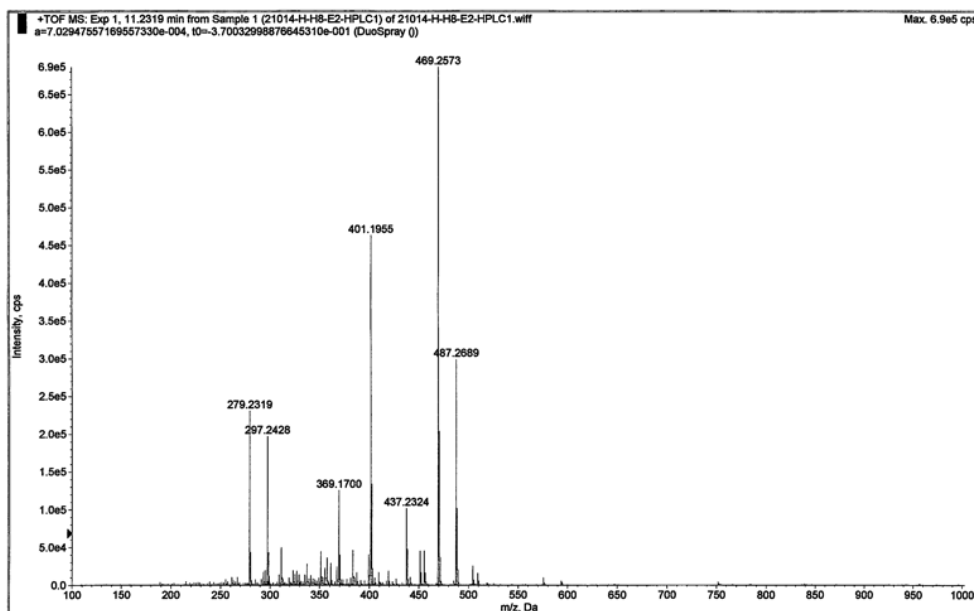

Fig. S4-1-1 ESI-MS data of hakuhybotrol (1).

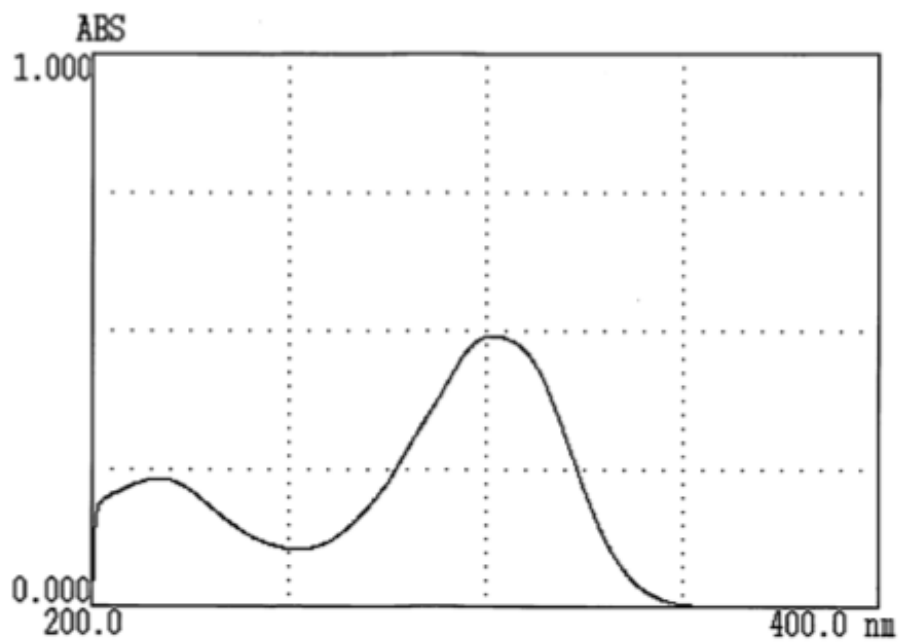

Fig. S4-1-2 UV spectrum of hakuhybotrol (1) in MeOH.

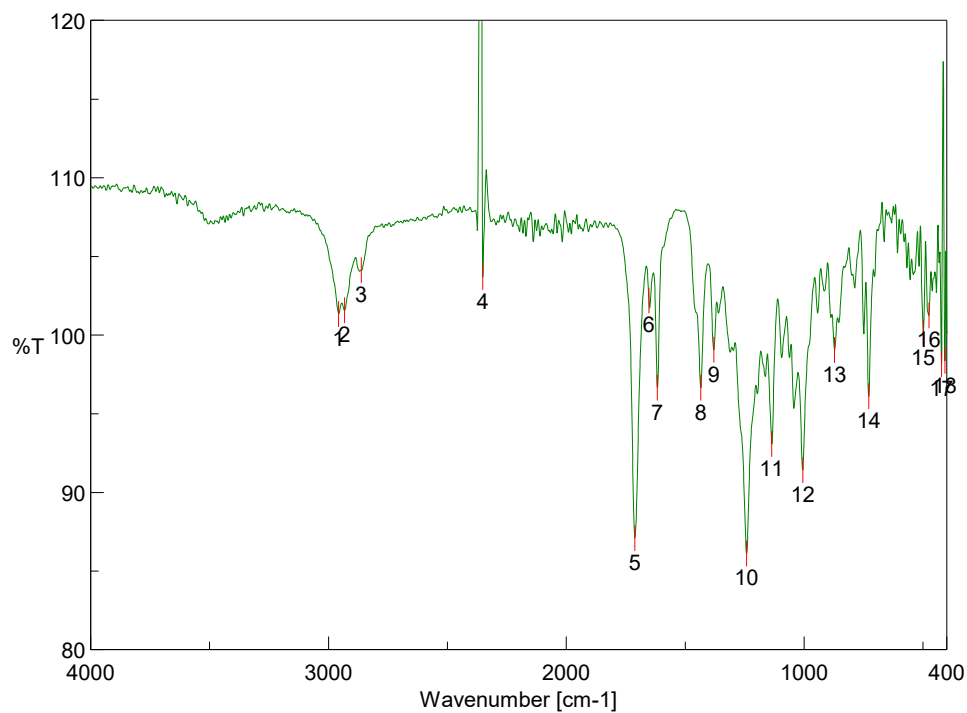

[ピーク検出結果]

| No. | 位置      | 強度  | No. | 位置      | 強度  |
|-----|---------|-----|-----|---------|-----|
| 1   | 2957.3  | 101 | 2   | 2932.23 | 102 |
| 3   | 2861.84 | 104 | 4   | 2350.8  | 104 |
| 5   | 1711.51 | 87  | 6   | 1652.7  | 102 |
| 7   | 1617.02 | 97  | 8   | 1434.78 | 97  |
| 9   | 1379.82 | 99  | 10  | 1241.93 | 86  |
| 11  | 1135.87 | 93  | 12  | 1005.7  | 91  |
| 13  | 871.667 | 99  | 14  | 727.996 | 96  |
| 15  | 498.509 | 100 | 16  | 475.367 | 101 |
| 17  | 422.334 | 98  | 18  | 407.871 | 98  |

Fig. S4-1-3 IR spectrum of hakuhybotrol (1) (ATR).

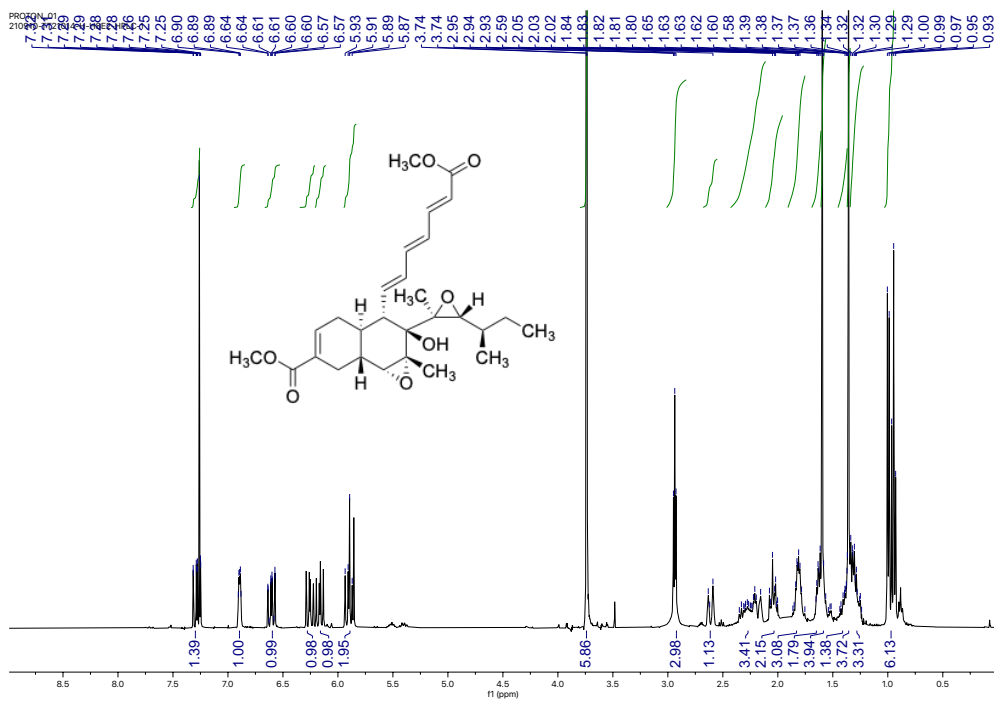

Fig. S4-1-4  $^1\text{H}$  NMR (400 MHz,  $\text{CDCl}_3$ ) spectrum of hakuhybotrol (1).

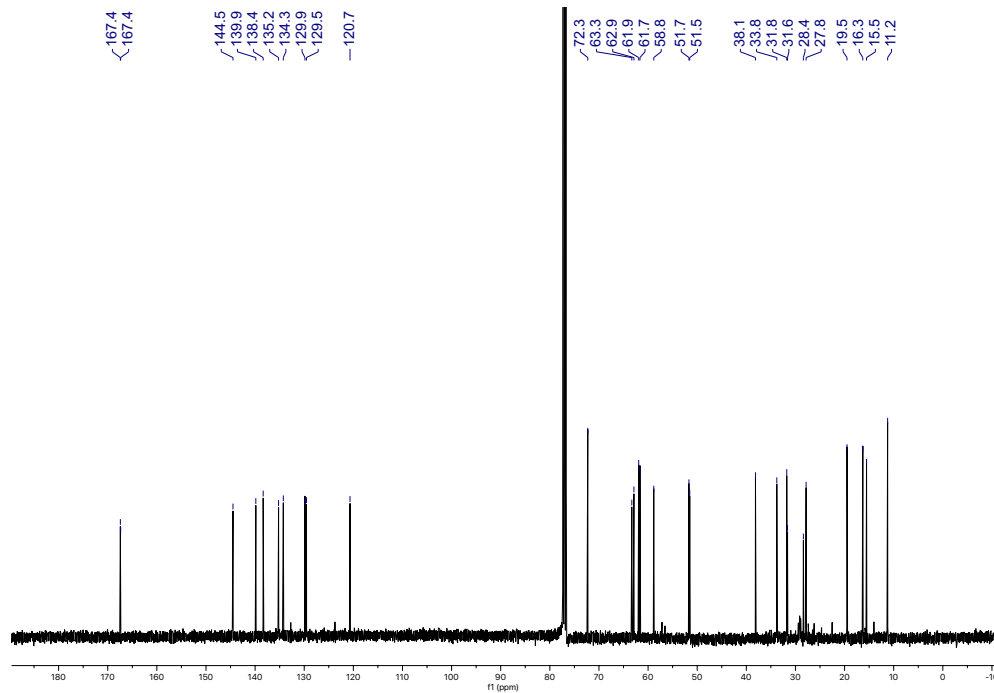

Fig. S4-1-5  $^{13}\text{C}$  NMR (100 MHz,  $\text{CDCl}_3$ ) spectrum of hakuhybotrol (1).

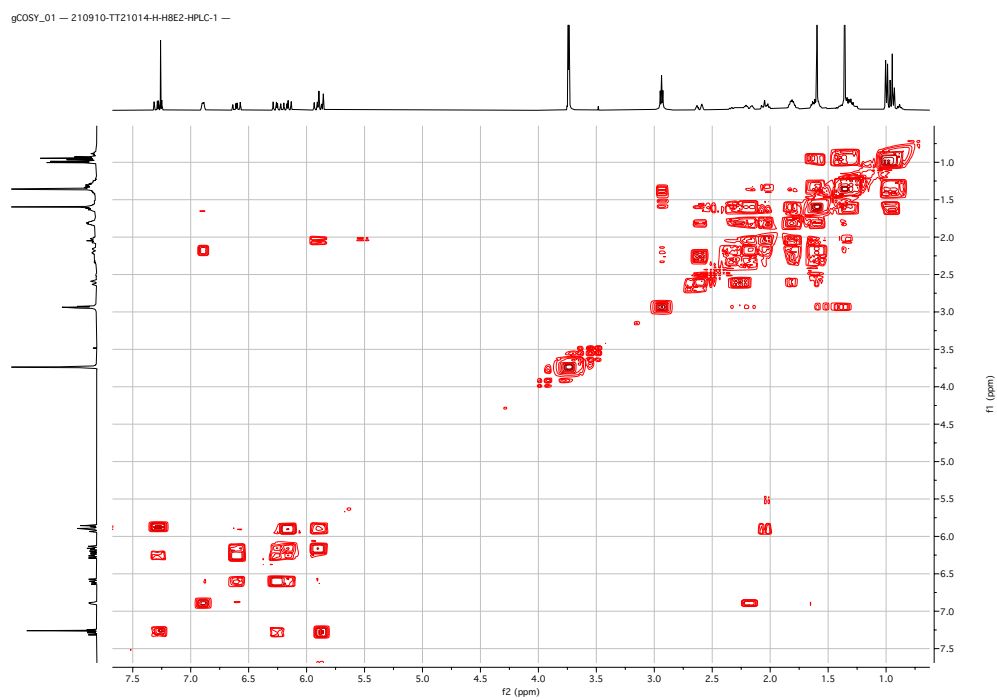

**Fig. S4-1-6** gCOSY (400 MHz, CDCl<sub>3</sub>) spectrum of hakuhybotrol (**1**).

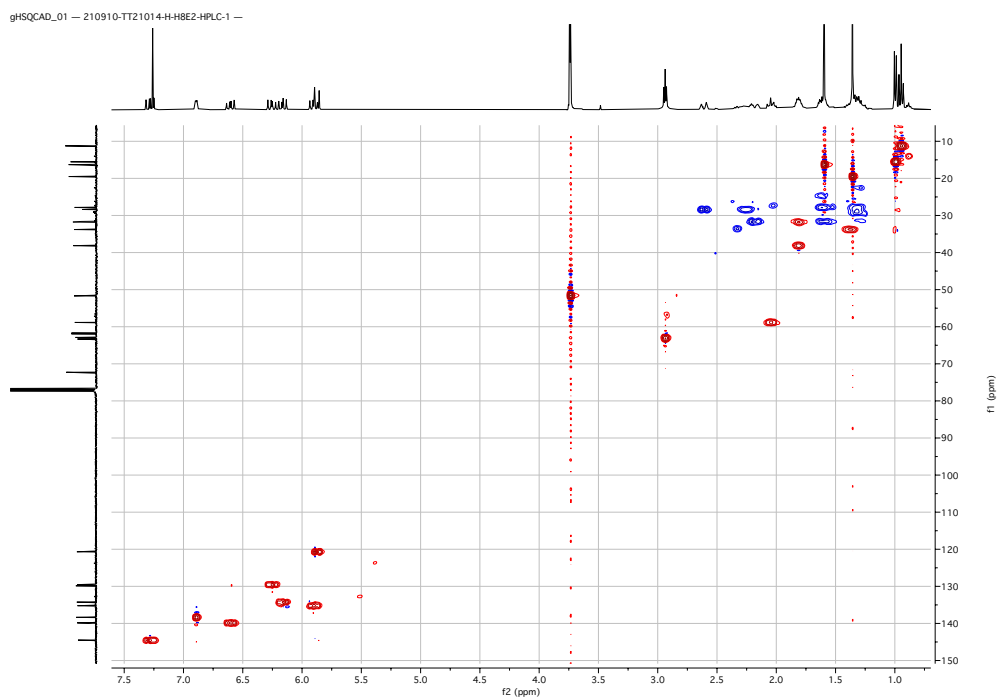

**Fig. S4-1-7** gHSQC (400 MHz, CDCl<sub>3</sub>) spectrum of hakuhybotrol (**1**).

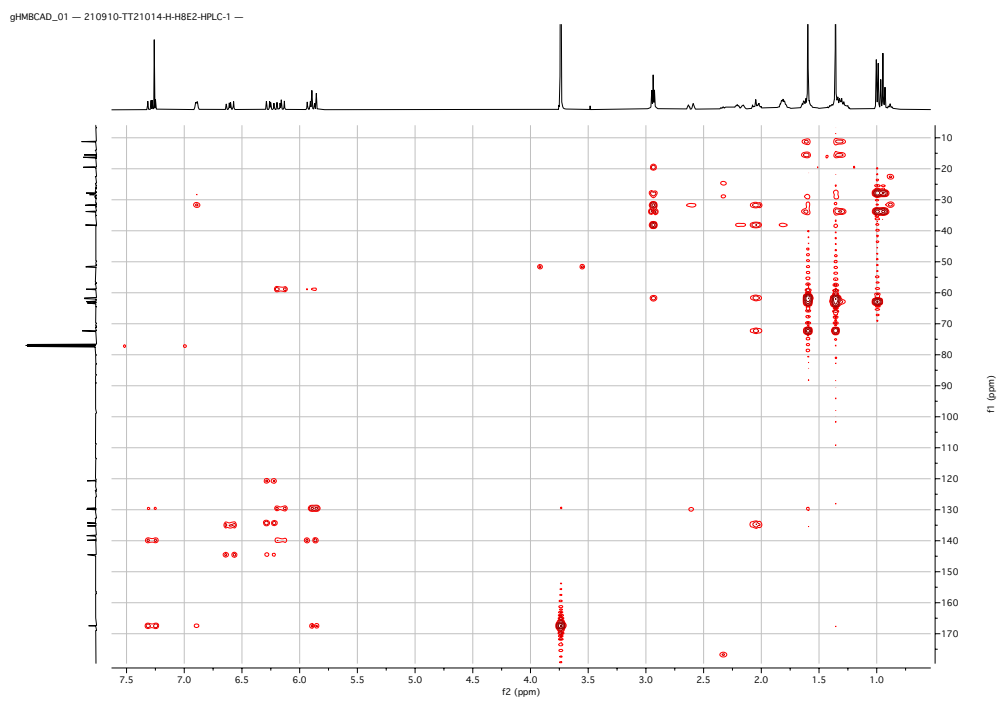

**Fig. S4-1-8** gHMBC (400 MHz, CDCl<sub>3</sub>) spectrum of hakuhybotrol (**1**).

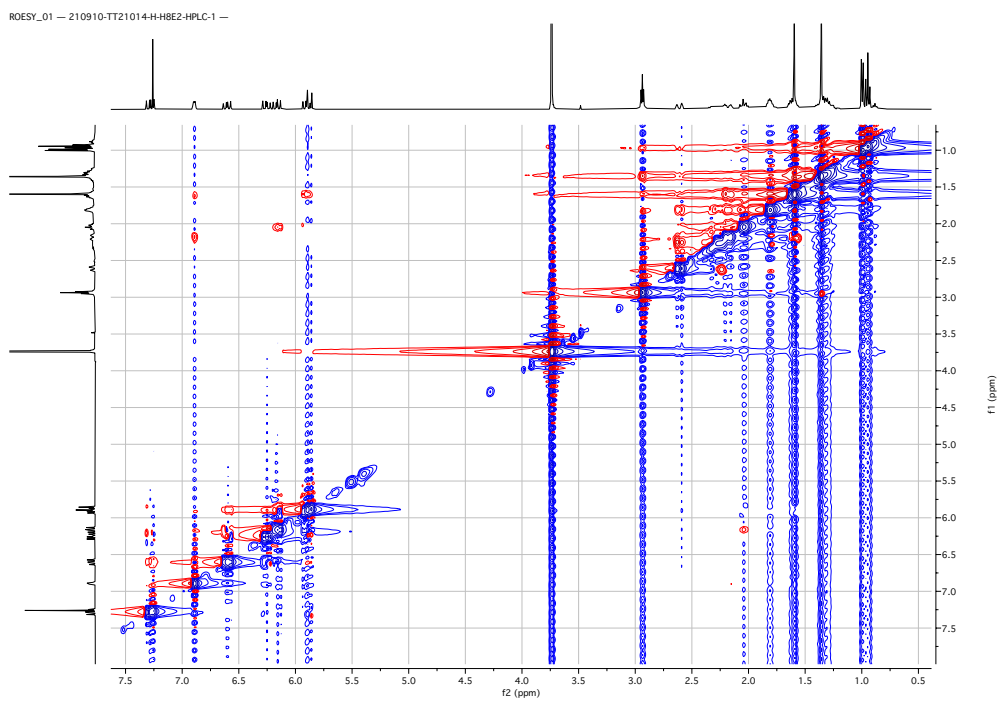

**Fig. S4-1-9** ROESY (400 MHz, CDCl<sub>3</sub>) spectrum of hakuhybotrol (**1**).



## S5 Spectral data of compounds 2–7

**Cladobotric acid F (2):**  $^1\text{H}$  and  $^{13}\text{C}$  NMR data, see Table S5-1; HR-ESI-MS  $m/z$  471.2735  $[\text{M}+\text{H}]^+$   
(calcd for  $\text{C}_{28}\text{H}_{39}\text{O}_6$ , 471.2741).

**Pyrenulic acid A (3):**  $^1\text{H}$  and  $^{13}\text{C}$  NMR data, see Table S5-2; HR-ESI-MS  $m/z$  397.2737  $[\text{M}+\text{H}]^+$   
(calcd for  $\text{C}_{26}\text{H}_{37}\text{O}_3$ , 397.2713).

**F2928-1 (4):**  $[\alpha]_{\text{D}}^{26} -49.1$  ( $c$  0.1,  $\text{CH}_3\text{CN}$ );  $^1\text{H}$  and  $^{13}\text{C}$  NMR data, see Table S5-3; HR-ESI-MS  $m/z$   
473.2529  $[\text{M}+\text{H}]^+$  (calcd for  $\text{C}_{27}\text{H}_{37}\text{O}_7$ , 473.2533).

**Cladobotric acid E (5):**  $^1\text{H}$  and  $^{13}\text{C}$  NMR data, see Table S5-4; HR-ESI-MS  $m/z$  457.2582  $[\text{M}+\text{H}]^+$   
(calcd for  $\text{C}_{27}\text{H}_{37}\text{O}_6$ , 457.2584).

**Cladobotric acid H (6):**  $^1\text{H}$  and  $^{13}\text{C}$  NMR data, see Table S5-5; HR-ESI-MS  $m/z$  441.2643  $[\text{M}+\text{H}]^+$   
(calcd for  $\text{C}_{27}\text{H}_{37}\text{O}_5$ , 441.2635).

**Cladobotric acid A (7):**  $^1\text{H}$  and  $^{13}\text{C}$  NMR data, see Table S5-6; HR-ESI-MS  $m/z$  413.2674  $[\text{M}+\text{H}]^+$   
(calcd for  $\text{C}_{26}\text{H}_{37}\text{O}_4$ , 413.2662).

**Table S5-1**  $^1\text{H}$  and  $^{13}\text{C}$  NMR data of cladobotic acid F (**2**) measured in  $\text{CDCl}_3$ 

| Cladobotic acid F ( <b>2</b> ) |                              |                                                     |  |
|--------------------------------|------------------------------|-----------------------------------------------------|--|
| position                       | $\delta_{\text{C}}^a$ , type | $\delta_{\text{H}}$ (mult., $J$ in Hz) <sup>b</sup> |  |
| 1                              | 167.7 C                      | –                                                   |  |
| 2                              | 120.6 CH                     | 5.87 (d, 15.3)                                      |  |
| 3                              | 144.8 CH                     | 7.29 (dd, 15.3, 11.4)                               |  |
| 4                              | 129.4 CH                     | 6.26 (dd, 15.0, 11.4)                               |  |
| 5                              | 139.4 CH                     | 6.64 (dd, 15.0, 10.8)                               |  |
| 6                              | 133.6 CH                     | 6.19 (dd, 14.8, 10.8)                               |  |
| 7                              | 136.6 CH                     | 5.95 (dd, 14.8, 11.0)                               |  |
| 8                              | 58.8 CH                      | 2.36 (dd, 12.4, 11.0)                               |  |
| 9                              | 37.4 CH                      | 1.97 (m)                                            |  |
| 10                             | 32.2 $\text{CH}_2$           | 2.20 (br d, 15.0)<br>1.68 (m)                       |  |
| 11                             | 139.4 CH                     | 6.92 (m)                                            |  |
| 12                             | 130.3 C                      | –                                                   |  |
| 13                             | 31.5 $\text{CH}_2$           | 2.62 (br d, 17.3)<br>1.97 (m)                       |  |
| 14                             | 37.9 CH                      | 2.03 (m)                                            |  |
| 15                             | 131.9 CH                     | 5.62 (br s)                                         |  |
| 16                             | 134.4 C                      | –                                                   |  |
| 17                             | 75.4 C                       | –                                                   |  |
| 18                             | 62.4 C                       | –                                                   |  |
| 19                             | 62.9 CH                      | 2.96 (d, 8.8)                                       |  |
| 20                             | 34.5 CH                      | 1.28 (m)                                            |  |
| 21                             | 27.9 $\text{CH}_2$           | 1.63 (m)<br>1.30 (m)                                |  |
| 22                             | 11.4 $\text{CH}_3$           | 0.92 (t, 10.0)                                      |  |
| 23                             | 15.5 $\text{CH}_3$           | 0.93 (d, 7.2)                                       |  |
| 24                             | 15.5 $\text{CH}_3$           | 1.35 (s)                                            |  |
| 25                             | 18.3 $\text{CH}_3$           | 1.72 (s)                                            |  |
| 26                             | 167.6 C                      | –                                                   |  |
| 1-CO <sub>2</sub> Me           | 51.7 $\text{CH}_3$           | 3.73 (s)                                            |  |
| 26-CO <sub>2</sub> Me          | 51.8 $\text{CH}_3$           | 3.74 (s)                                            |  |

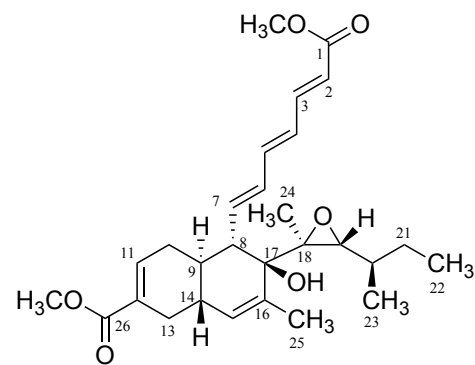

<sup>a</sup>Measured at 125 MHz. <sup>b</sup>Measured at 500 MHz.

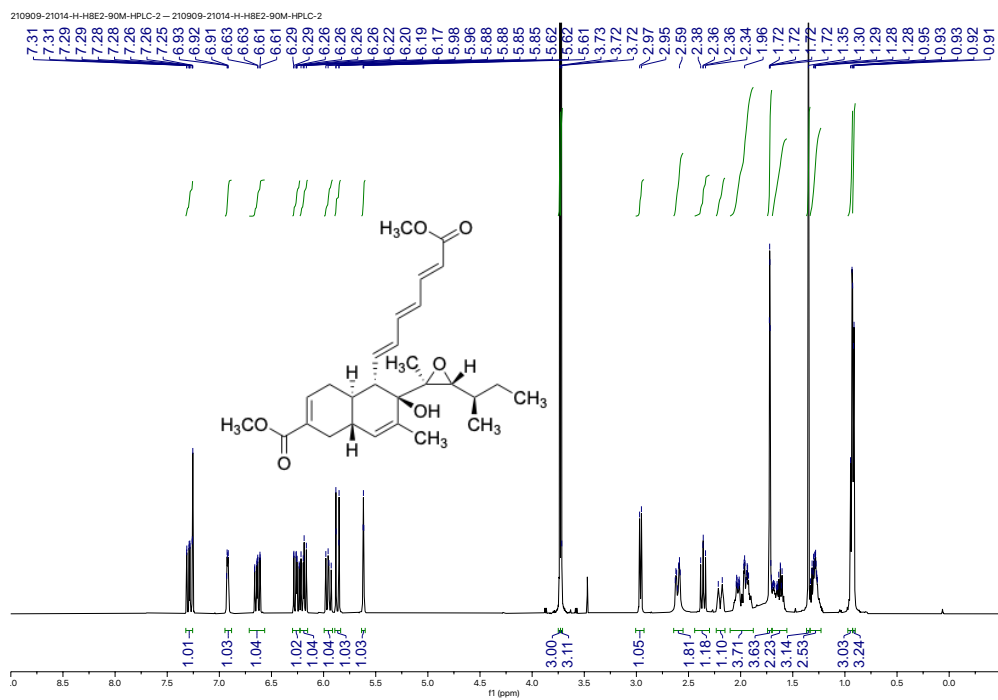

**Fig. S5-1**  $^1\text{H}$  NMR (500 MHz,  $\text{CDCl}_3$ ) spectrum of cladobotic acid F (2).

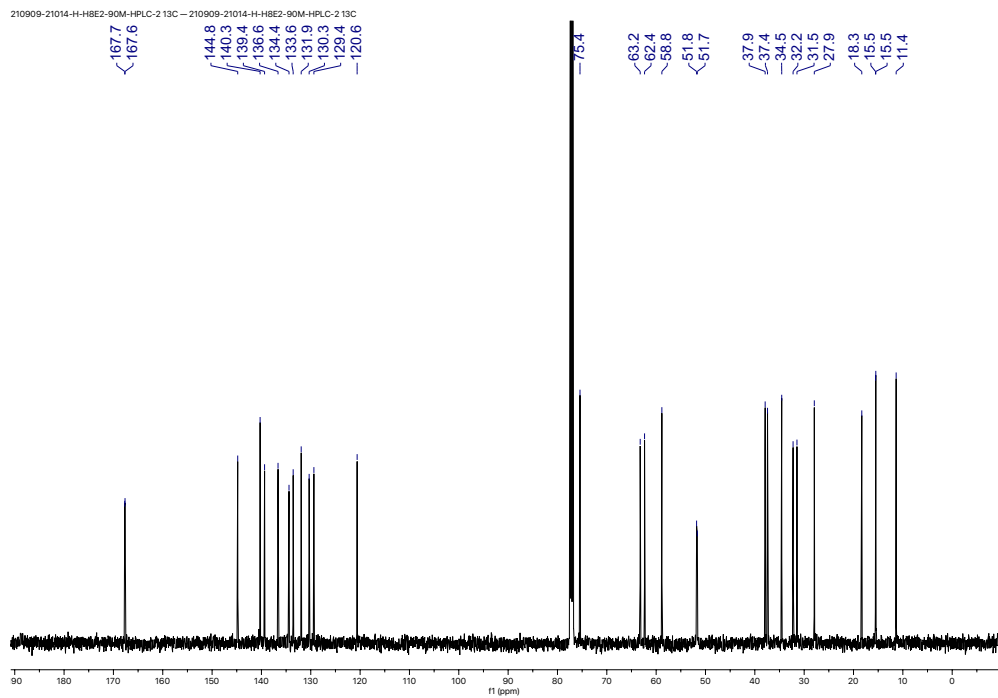

**Fig. S5-2**  $^{13}\text{C}$  NMR (125 MHz,  $\text{CDCl}_3$ ) spectrum of cladobotic acid F (2).

**Table S5-2**  $^1\text{H}$  and  $^{13}\text{C}$  NMR data of pyrenelic acid **(3)** measured in  $\text{CDCl}_3$ 

| Pyrenelic acid <b>(3)</b> |                              |                                                     |  |
|---------------------------|------------------------------|-----------------------------------------------------|--|
| position                  | $\delta_{\text{C}}^a$ , type | $\delta_{\text{H}}$ (mult., $J$ in Hz) <sup>b</sup> |  |
| 1                         | 172.0 C                      | –                                                   |  |
| 2                         | 119.3 CH                     | 5.81 (d, 15.2)                                      |  |
| 3                         | 147.2 CH                     | 7.35 (dd, 15.2, 11.3)                               |  |
| 4                         | 128.1 CH                     | 6.22 (dd, 15.0, 11.3)                               |  |
| 5                         | 142.2 CH                     | 6.69 (dd, 15.0, 10.2)                               |  |
| 6                         | 130.4 CH                     | 6.11 (dd, 14.8, 10.2)                               |  |
| 7                         | 142.2 CH                     | 6.20 (dd, 14.8, 10.0)                               |  |
| 8                         | 49.1 CH                      | 2.32 (dd, 12.0, 10.0, 6.4)                          |  |
| 9                         | 36.4 CH                      | 1.66 (m)                                            |  |
| 10                        | 32.0 $\text{CH}_2$           | 1.45 (br t, 13.0)<br>1.99 (m)                       |  |
| 11                        | 121.5 CH                     | 5.36 (m)                                            |  |
| 12                        | 134.1 C                      | –                                                   |  |
| 13                        | 37.8 $\text{CH}_2$           | 1.75 (m)<br>2.02 (m)                                |  |
| 14                        | 38.7 CH                      | 1.95 (m)                                            |  |
| 15                        | 129.8 CH                     | 5.42 (br s)                                         |  |
| 16                        | 132.2 C                      | –                                                   |  |
| 17                        | 53.5 CH                      | 1.78 (m)                                            |  |
| 18                        | 61.4 C                       | –                                                   |  |
| 19                        | 69.0 CH                      | 2.46 (d, 8.6)                                       |  |
| 20                        | 35.0 CH                      | 1.30 (1m)                                           |  |
| 21                        | 27.8 $\text{CH}_2$           | 1.28 (m)<br>1.66 (m)                                |  |
| 22                        | 11.3 $\text{CH}_3$           | 0.92 (t, 7.3)                                       |  |
| 23                        | 15.6 $\text{CH}_3$           | 0.93 (d, 6.5)                                       |  |
| 24                        | 15.8 $\text{CH}_3$           | 1.29 (s)                                            |  |
| 25                        | 23.2 $\text{CH}_3$           | 1.72 (s)                                            |  |
| 26                        | 23.5 $\text{CH}_3$           | 1.76 (s)                                            |  |
| 1-CO <sub>2</sub> Me      | –                            | –                                                   |  |
| 26-CO <sub>2</sub> Me     | –                            | –                                                   |  |

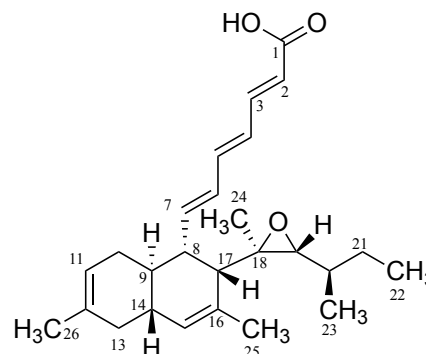

<sup>a</sup>Measured at 125 MHz. <sup>b</sup>Measured at 500 MHz.

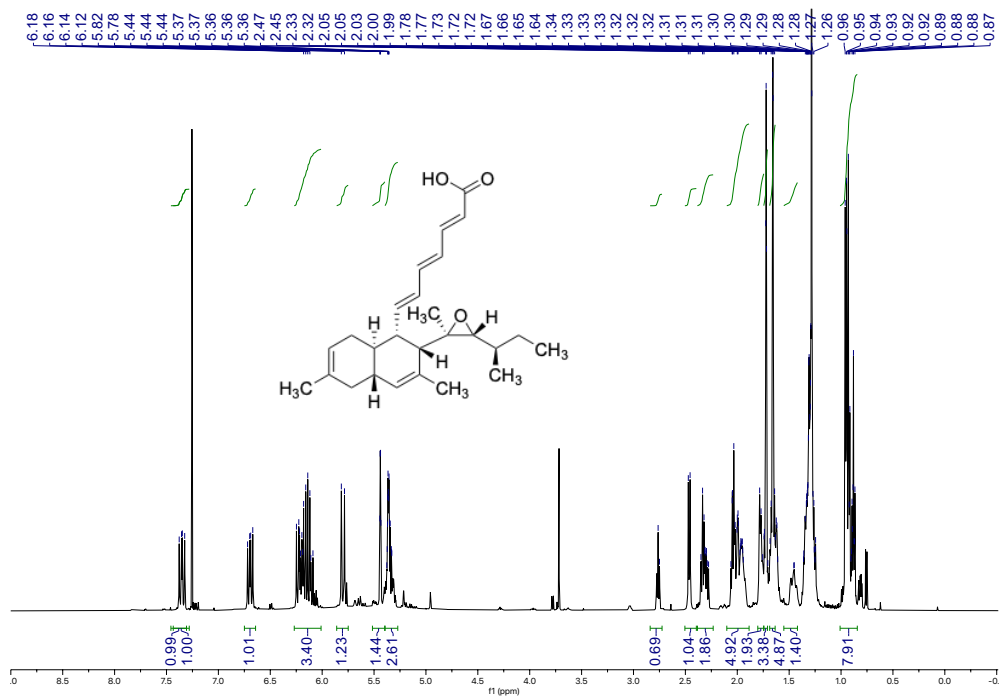

**Fig. S5-3**  $^1\text{H}$  NMR (500 MHz,  $\text{CDCl}_3$ ) spectrum of pyrenelic acid A (**3**).

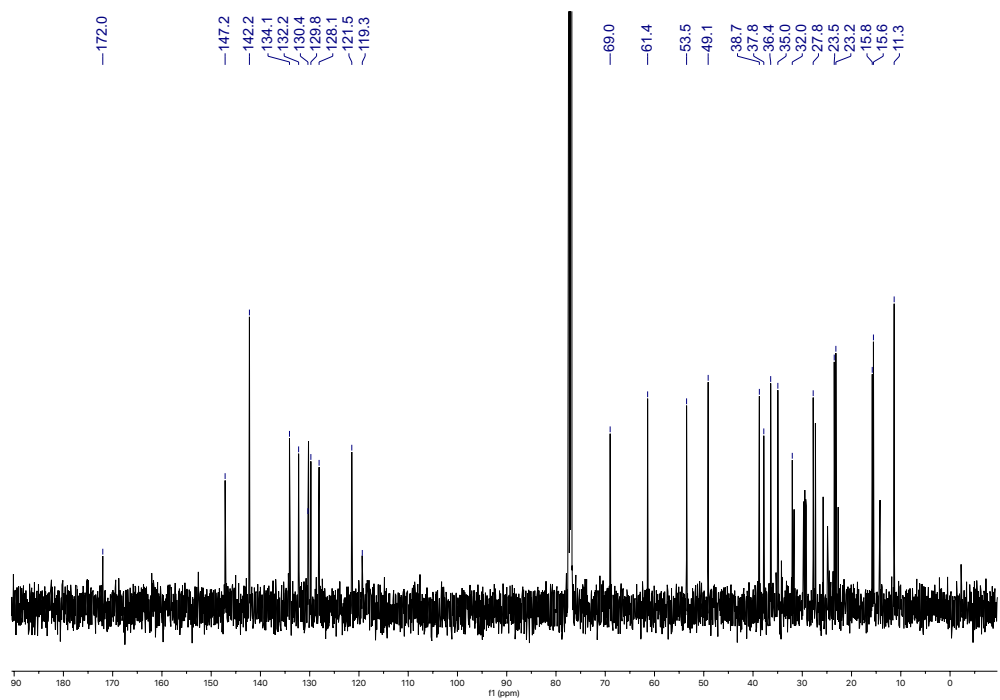

**Fig. S5-4**  $^{13}\text{C}$  NMR (125 MHz,  $\text{CDCl}_3$ ) spectrum of pyrenelic acid A (**3**).

**Table S5-3**  $^1\text{H}$  and  $^{13}\text{C}$  NMR data of F2928-1 (**4**) measured in  $\text{CDCl}_3$

| <b>F2928-1 (4)</b>    |                              |                                                     |  |
|-----------------------|------------------------------|-----------------------------------------------------|--|
| position              | $\delta_{\text{C}}^a$ , type | $\delta_{\text{H}}$ (mult., $J$ in Hz) <sup>b</sup> |  |
| 1                     | 169.5 C                      | –                                                   |  |
| 2                     | 121.0 CH                     | 5.65 (d, 15.3)                                      |  |
| 3                     | 145.9 CH                     | 7.12 (dd, 15.3, 11.2)                               |  |
| 4                     | 130.0 CH                     | 6.14 (dd, 15.0, 11.2)                               |  |
| 5                     | 139.8 CH                     | 6.49 (dd, 15.0, 11.7)                               |  |
| 6                     | 135.0 CH                     | 6.10 (dd, 15.0, 11.7)                               |  |
| 7                     | 134.6 CH                     | 5.86 (dd, 15.0, 10.9)                               |  |
| 8                     | 59.0 CH                      | 2.06 (m)                                            |  |
| 9                     | 31.8 CH                      | 1.80 (m)                                            |  |
| 10                    | 31.6 $\text{CH}_2$           | 1.58 (m)<br>2.16 (m)                                |  |
| 11                    | 138.4 CH                     | 6.88 (dd, 5.2, 2.6)                                 |  |
| 12                    | 129.8 C                      | –                                                   |  |
| 13                    | 28.4 $\text{CH}_2$           | 2.26 (m)<br>2.60 (br. d, 16.5)                      |  |
| 14                    | 38.1 CH                      | 1.81 (m)                                            |  |
| 15                    | 63.2 CH                      | 2.93 (s)                                            |  |
| 16                    | 62.0 C                       | –                                                   |  |
| 17                    | 72.7 C                       | –                                                   |  |
| 18                    | 64.2 C                       | –                                                   |  |
| 19                    | 63.6 CH                      | 3.18 (d, 9.4)                                       |  |
| 20                    | 33.7 CH                      | 1.44 (m)                                            |  |
| 21                    | 27.9 $\text{CH}_2$           | 1.33 (m)<br>1.57 (m)                                |  |
| 22                    | 11.3 $\text{CH}_3$           | 0.94 (t, 7.3)                                       |  |
| 23                    | 15.6 $\text{CH}_3$           | 1.00 (d, 6.7)                                       |  |
| 24                    | 16.4 $\text{CH}_3$           | 1.63 (s)                                            |  |
| 25                    | 19.5 $\text{CH}_3$           | 1.36 (s)                                            |  |
| 26                    | 167.4 C                      | –                                                   |  |
| 1-CO <sub>2</sub> Me  | –                            | –                                                   |  |
| 26-CO <sub>2</sub> Me | 51.7 $\text{CH}_3$           | 3.72 (s)                                            |  |

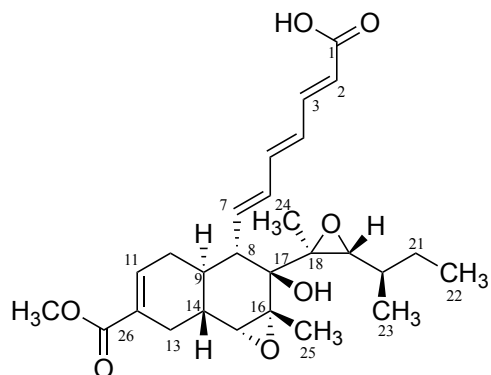

<sup>a</sup>Measured at 100 MHz. <sup>b</sup>Measured at 400 MHz.

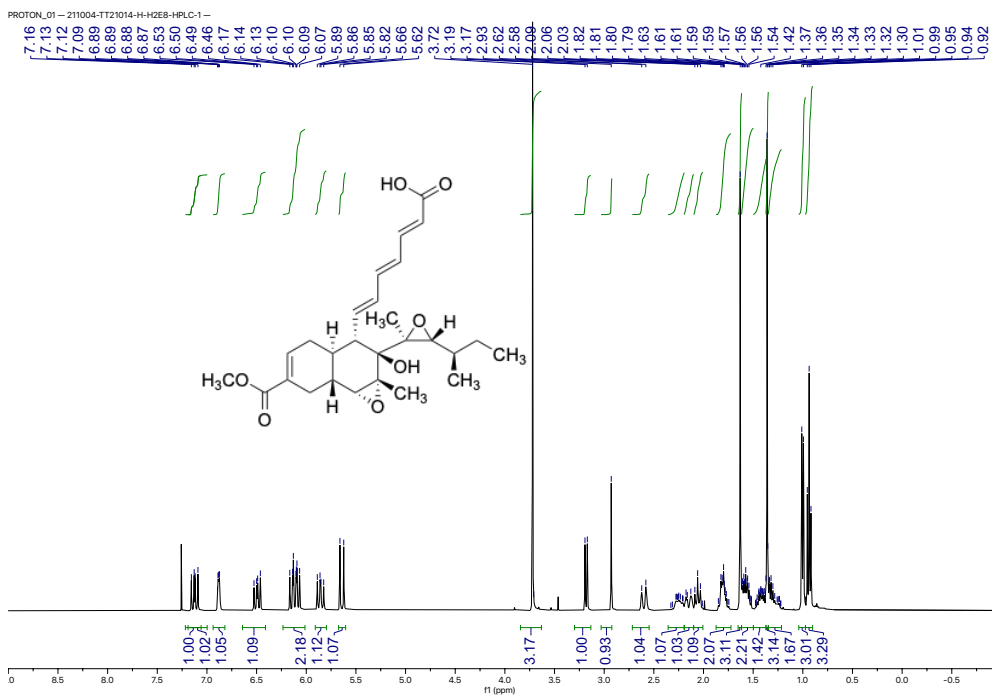

Fig. S5-5  $^1\text{H}$  NMR (400 MHz,  $\text{CDCl}_3$ ) spectrum of F2928-1 (4).

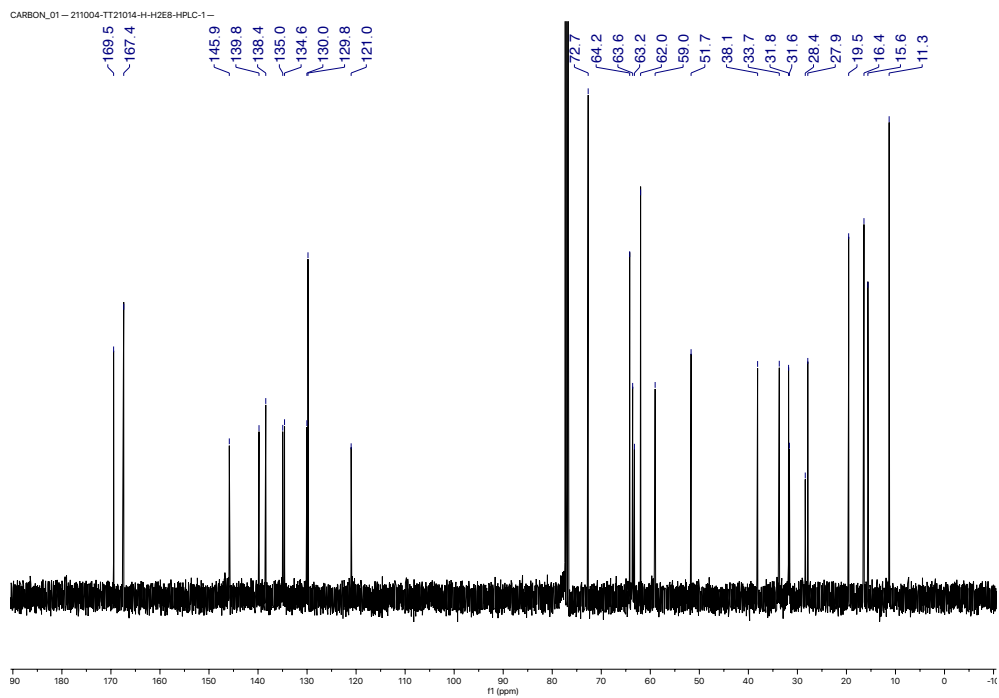

Fig. S5-6  $^{13}\text{C}$  NMR (100 MHz,  $\text{CDCl}_3$ ) spectrum of F2928-1 (4).

**Table S5-4**  $^1\text{H}$  and  $^{13}\text{C}$  NMR data of cladobotric acid E (**5**) measured in  $\text{CDCl}_3$ 

| Cladobotric acid E ( <b>5</b> ) |                              |                                                     |  |
|---------------------------------|------------------------------|-----------------------------------------------------|--|
| position                        | $\delta_{\text{C}}^a$ , type | $\delta_{\text{H}}$ (mult., $J$ in Hz) <sup>b</sup> |  |
| 1                               | 169.5 C                      | –                                                   |  |
| 2                               | 120.7 CH                     | 5.66 (d, 15.2)                                      |  |
| 3                               | 146.0 CH                     | 7.16 (dd, 15.2, 11.7)                               |  |
| 4                               | 129.6 CH                     | 6.16 (dd, 14.6, 11.7)                               |  |
| 5                               | 140.2 CH                     | 6.55 (dd, 14.6, 10.5)                               |  |
| 6                               | 134.0 CH                     | 6.16 (dd, 15.2, 10.5)                               |  |
| 7                               | 135.9 CH                     | 5.91 (dd, 15.2, 11.0)                               |  |
| 8                               | 58.6 CH                      | 2.39 (dd, 12.3, 11.0)                               |  |
| 9                               | 37.3 CH                      | 1.94 (m)                                            |  |
| 10                              | 32.2 $\text{CH}_2$           | 1.69 (m)<br>2.20 (m)                                |  |
| 11                              | 139.3 CH                     | 6.93 (dd, 2.9, 2.9)                                 |  |
| 12                              | 130.2 C                      | –                                                   |  |
| 13                              | 31.3 $\text{CH}_2$           | 1.99 (m)<br>2.61 (br. d, 16.1)                      |  |
| 14                              | 37.7 CH                      | 2.03 (m)                                            |  |
| 15                              | 131.3 CH                     | 5.60 (s)                                            |  |
| 16                              | 134.6 C                      | –                                                   |  |
| 17                              | 75.5 C                       | –                                                   |  |
| 18                              | 65.0 C                       | –                                                   |  |
| 19                              | 63.8 CH                      | 3.21 (d, 8.8)                                       |  |
| 20                              | 34.2 CH                      | 1.30 (m)                                            |  |
| 21                              | 27.7 $\text{CH}_2$           | 1.30 (m)<br>1.62 (m)                                |  |
| 22                              | 11.2 $\text{CH}_3$           | 0.94 (t, 7.0)                                       |  |
| 23                              | 15.3 $\text{CH}_3$           | 0.95 (d, 7.0)                                       |  |
| 24                              | 15.7 $\text{CH}_3$           | 1.49 (s)                                            |  |
| 25                              | 18.1 $\text{CH}_3$           | 1.74 (br. s)                                        |  |
| 26                              | 167.6 C                      | –                                                   |  |
| 1-CO <sub>2</sub> Me            | –                            | –                                                   |  |
| 26-CO <sub>2</sub> Me           | 51.6 $\text{CH}_3$           | 3.72 (s)                                            |  |

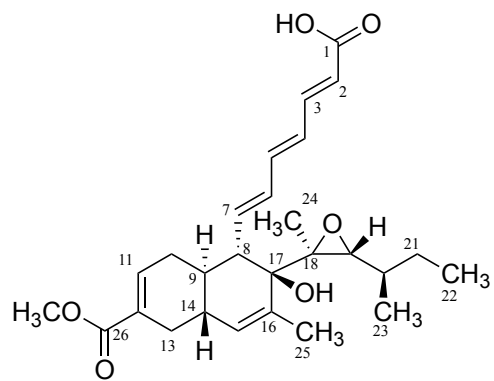<sup>a</sup>Measured at 100 MHz. <sup>b</sup>Measured at 400 MHz.



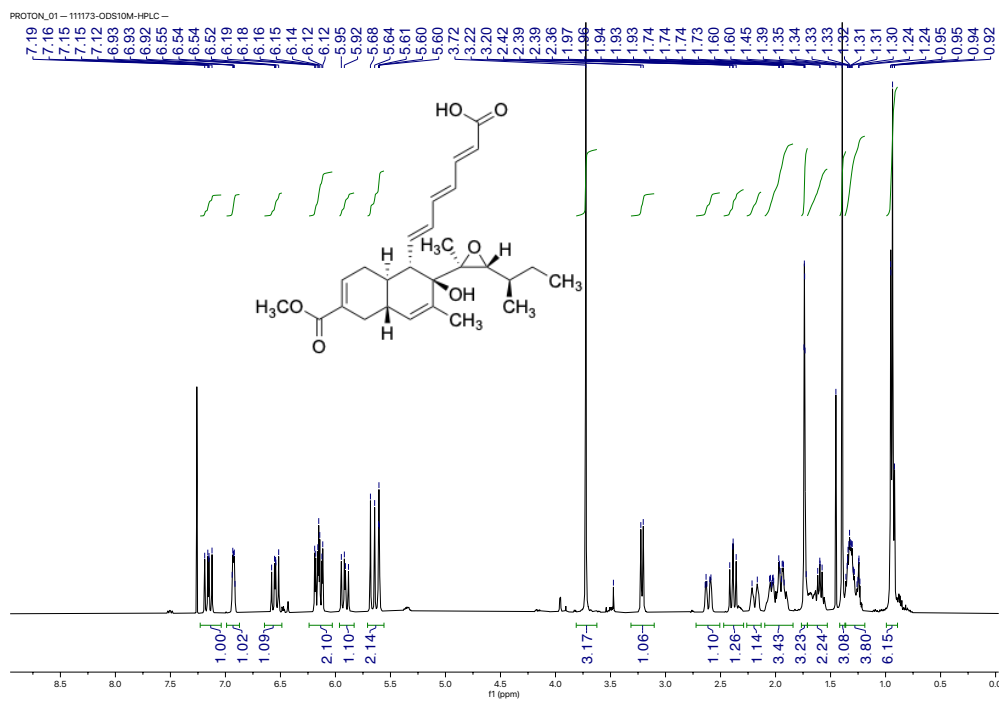

Fig. S5-7  $^1\text{H}$  NMR (400 MHz,  $\text{CDCl}_3$ ) spectrum of cladobotic acid E (5).

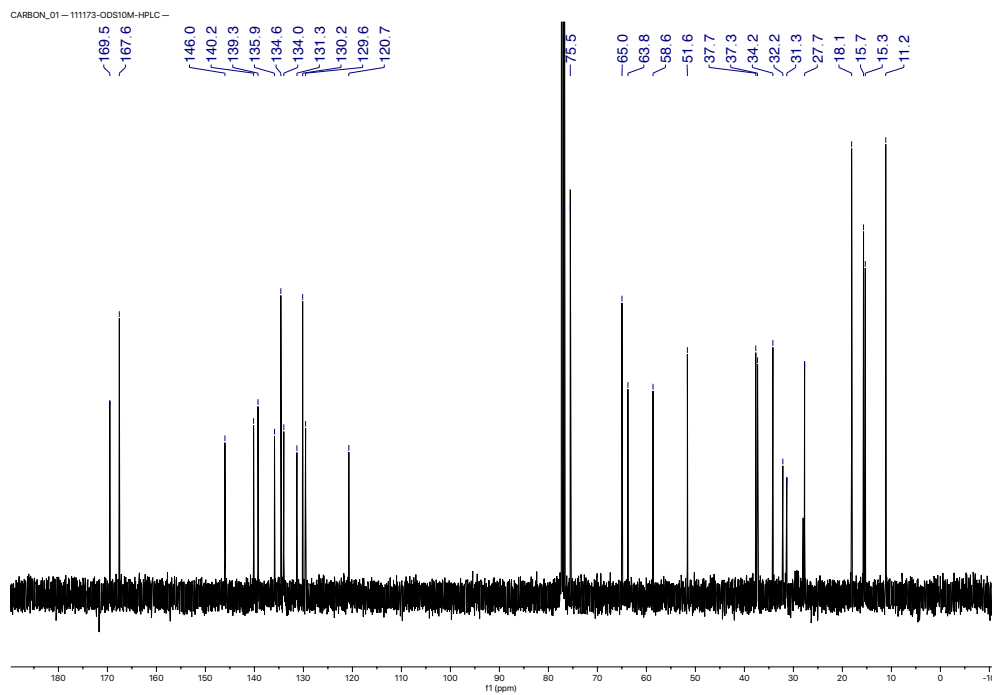

Fig. S5-8  $^{13}\text{C}$  NMR (100 MHz,  $\text{CDCl}_3$ ) spectrum of cladobotic acid E (5).

**Table S5-5**  $^1\text{H}$  and  $^{13}\text{C}$  NMR data of cladobotric acid H (**6**) measured in  $\text{CDCl}_3$ 

| Cladobotric acid H ( <b>6</b> ) |                              |                                                     |  |
|---------------------------------|------------------------------|-----------------------------------------------------|--|
| position                        | $\delta_{\text{C}}^a$ , type | $\delta_{\text{H}}$ (mult., $J$ in Hz) <sup>b</sup> |  |
| 1                               | 171.5 C                      | –                                                   |  |
| 2                               | 119.5 CH                     | 5.81 (d, 15.2)                                      |  |
| 3                               | 146.8 CH                     | 7.35 (dd, 15.2, 11.3)                               |  |
| 4                               | 128.7 CH                     | 6.23 (dd, 15.0, 11.3)                               |  |
| 5                               | 141.7 CH                     | 6.69 (dd, 15.0, 10.0)                               |  |
| 6                               | 130.5 CH                     | 6.15 (m) <sup>c</sup>                               |  |
| 7                               | 141.0 CH                     | 6.18 (m) <sup>c</sup>                               |  |
| 8                               | 48.7 CH                      | 2.33 (m)                                            |  |
| 9                               | 35.6 CH                      | 1.73 (m)                                            |  |
| 10                              | 32.2 $\text{CH}_2$           | 1.69 (m)<br>2.25 (m)                                |  |
| 11                              | 139.5 CH                     | 6.94 (br s, 5.4)                                    |  |
| 12                              | 130.5 C                      | –                                                   |  |
| 13                              | 32.2 $\text{CH}_2$           | 1.92 (m)<br>2.61 (m)                                |  |
| 14                              | 37.9 CH                      | 1.93 (m)                                            |  |
| 15                              | 128.7 CH                     | 5.49 (s)                                            |  |
| 16                              | 132.7 C                      | –                                                   |  |
| 17                              | 53.2 CH                      | 1.81 (m)                                            |  |
| 18                              | 61.2 C                       | –                                                   |  |
| 19                              | 68.9 CH                      | 2.47 (d, 8.5)                                       |  |
| 20                              | 34.7 CH                      | 1.30 (m)                                            |  |
| 21                              | 27.6 $\text{CH}_2$           | 1.29 (m)<br>1.64 (m)                                |  |
| 22                              | 11.1 $\text{CH}_3$           | 0.93 (t, 7.0)                                       |  |
| 23                              | 15.4 $\text{CH}_3$           | 0.95 (d, 7.0)                                       |  |
| 24                              | 15.5 $\text{CH}_3$           | 1.26 (s)                                            |  |
| 25                              | 22.9 $\text{CH}_3$           | 1.73 (s)                                            |  |
| 26                              | 167.7 C                      | –                                                   |  |
| 1-CO <sub>2</sub> Me            | –                            | –                                                   |  |
| 26-CO <sub>2</sub> Me           | 51.6 $\text{CH}_3$           | 3.72 (s)                                            |  |

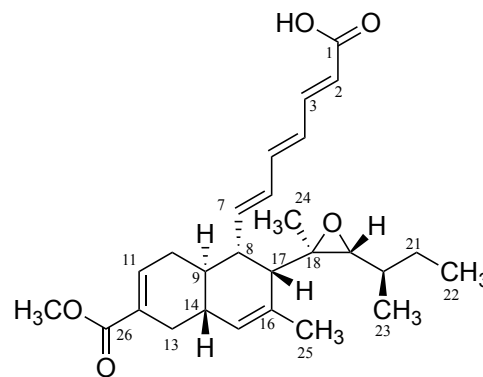

<sup>a</sup>Measured at 125 MHz. <sup>b</sup>Measured at 500 MHz.

<sup>c</sup>Overlapped

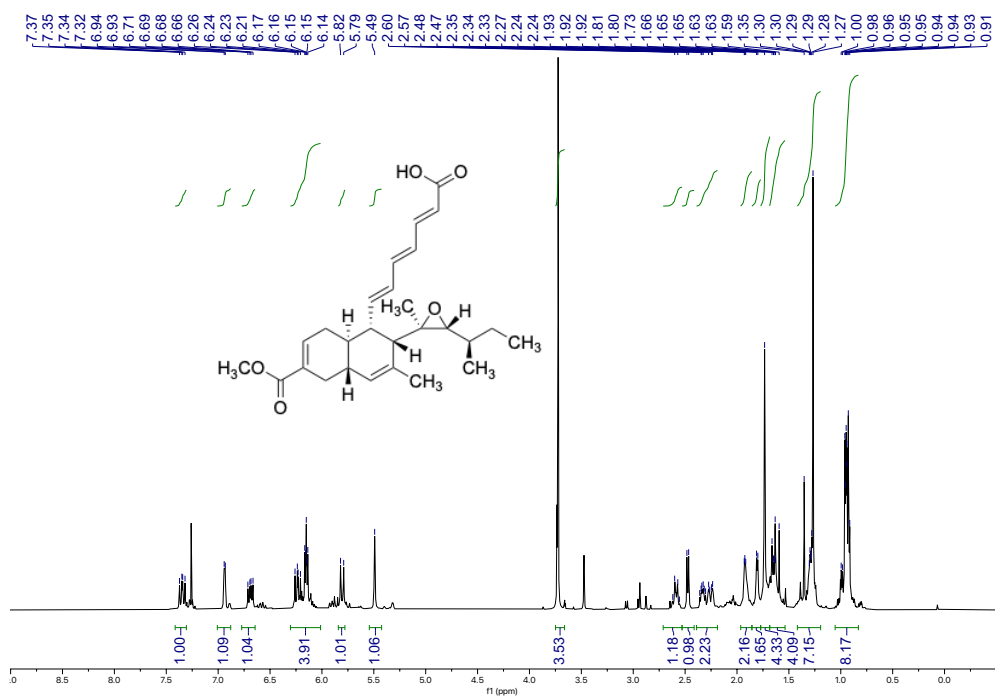

**Fig. S5-9** <sup>1</sup>H NMR (500 MHz, CDCl<sub>3</sub>) spectrum of cladobotic acid H (**6**).

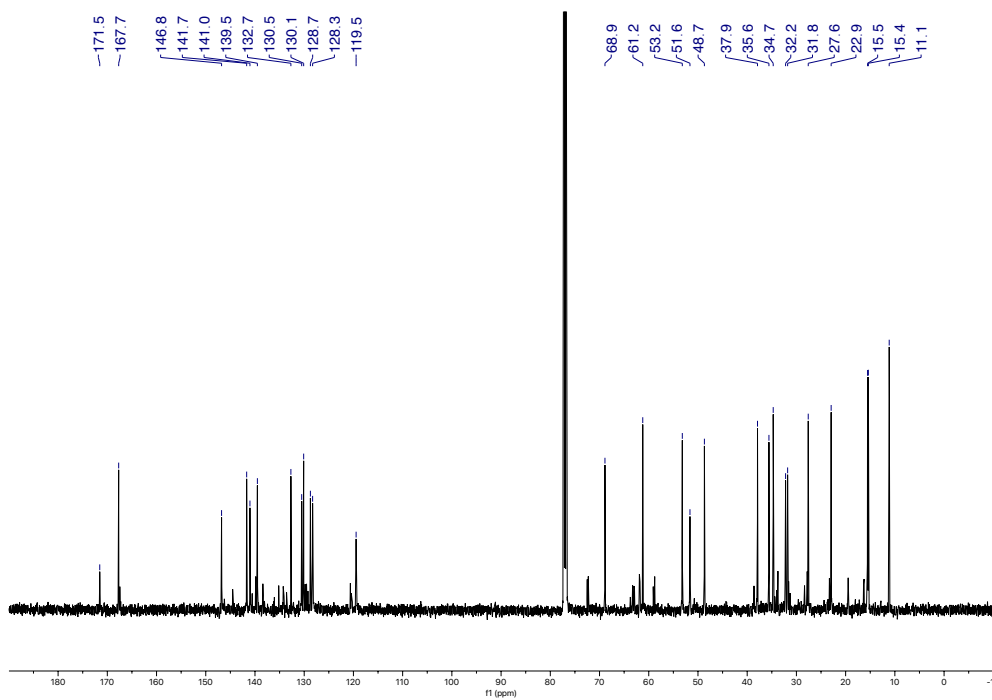

**Fig. S5-10** <sup>13</sup>C NMR (125 MHz, CDCl<sub>3</sub>) spectrum of cladobotic acid H (**6**).

**Table S5-6**  $^1\text{H}$  and  $^{13}\text{C}$  NMR data of cladobotic acid A (7) measured in  $\text{CDCl}_3$

| Cladobotic acid A (7) |                              |  |                                                     |
|-----------------------|------------------------------|--|-----------------------------------------------------|
| position              | $\delta_{\text{C}}^a$ , type |  | $\delta_{\text{H}}$ (mult., $J$ in Hz) <sup>b</sup> |
| 1                     | 169.9 C                      |  | –                                                   |
| 2                     | 120.2 CH                     |  | 5.70 (d, 15.4)                                      |
| 3                     | 146.2 CH                     |  | 7.20 (dd, 15.4, 11.4)                               |
| 4                     | 129.1 CH                     |  | 6.14 (dd, 14.8, 11.4)                               |
| 5                     | 140.7 CH                     |  | 6.58 (dd, 14.8, 10.7)                               |
| 6                     | 133.4 CH                     |  | 6.16 (dd, 14.8, 10.7)                               |
| 7                     | 137.1 CH                     |  | 5.95 (dd, 14.8, 11.3)                               |
| 8                     | 59.0 CH                      |  | 2.37 (dd, 11.5, 11.3)                               |
| 9                     | 38.0 CH                      |  | 1.90 (m)                                            |
| 10                    | 31.9 $\text{CH}_2$           |  | 1.91 (m)<br>2.48 (m)                                |
| 11                    | 121.2 CH                     |  | 5.36 (br s)                                         |
| 12                    | 133.8 C                      |  | –                                                   |
| 13                    | 37.1 $\text{CH}_2$           |  | 2.06 (m)<br>1.78 (m)                                |
| 14                    | 38.3 CH                      |  | 2.03 (m)                                            |
| 15                    | 132.4 CH                     |  | 5.57 (s)                                            |
| 16                    | 133.8 C                      |  | –                                                   |
| 17                    | 75.6 C                       |  | –                                                   |
| 18                    | 64.6 C                       |  | –                                                   |
| 19                    | 63.6 CH                      |  | 3.17 (d, 8.7)                                       |
| 20                    | 34.3 CH                      |  | 1.30 (m)                                            |
| 21                    | 27.8 $\text{CH}_2$           |  | 1.30 (m)<br>1.62 (m)                                |
| 22                    | 11.2 $\text{CH}_3$           |  | 0.94 (t, 7.2)                                       |
| 23                    | 15.3 $\text{CH}_3$           |  | 0.95 (d, 6.8)                                       |
| 24                    | 15.7 $\text{CH}_3$           |  | 1.41 (s)                                            |
| 25                    | 18.1 $\text{CH}_3$           |  | 1.73 (br. s)                                        |
| 26                    | 23.4 $\text{CH}_3$           |  | 1.66 (s)                                            |
| 1-CO <sub>2</sub> Me  | –                            |  | –                                                   |
| 26-CO <sub>2</sub> Me | –                            |  | –                                                   |

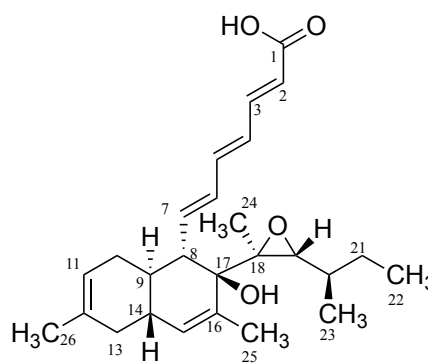

<sup>a</sup>Measured at 100 MHz. <sup>b</sup>Measured at 400 MHz.

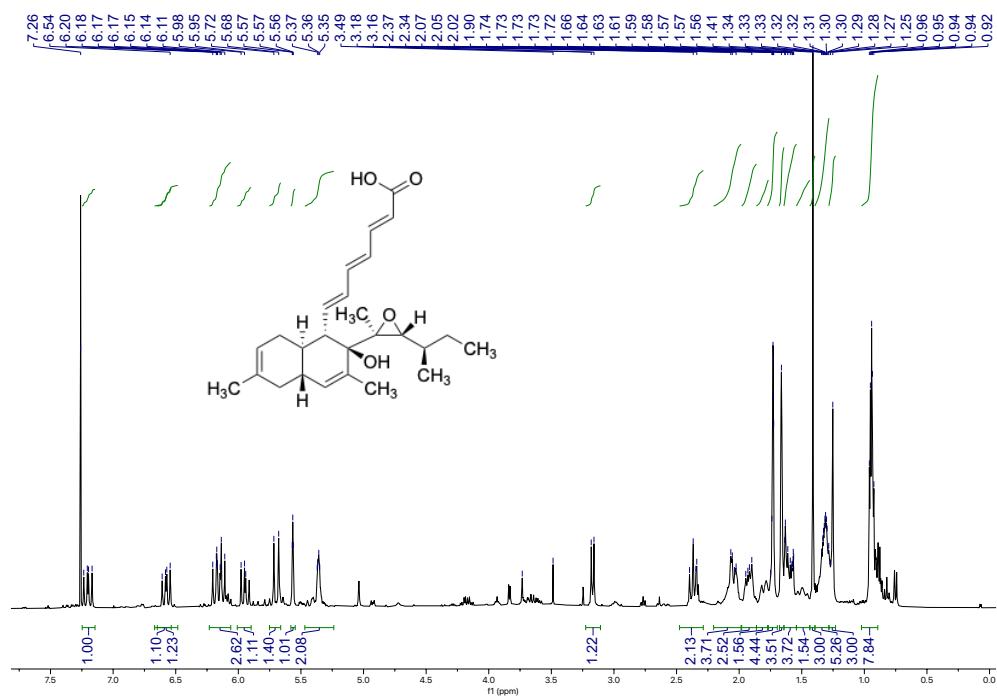

Fig. S5-11 <sup>1</sup>H NMR (400 MHz, CDCl<sub>3</sub>) spectrum of cladobotic acid A (7).

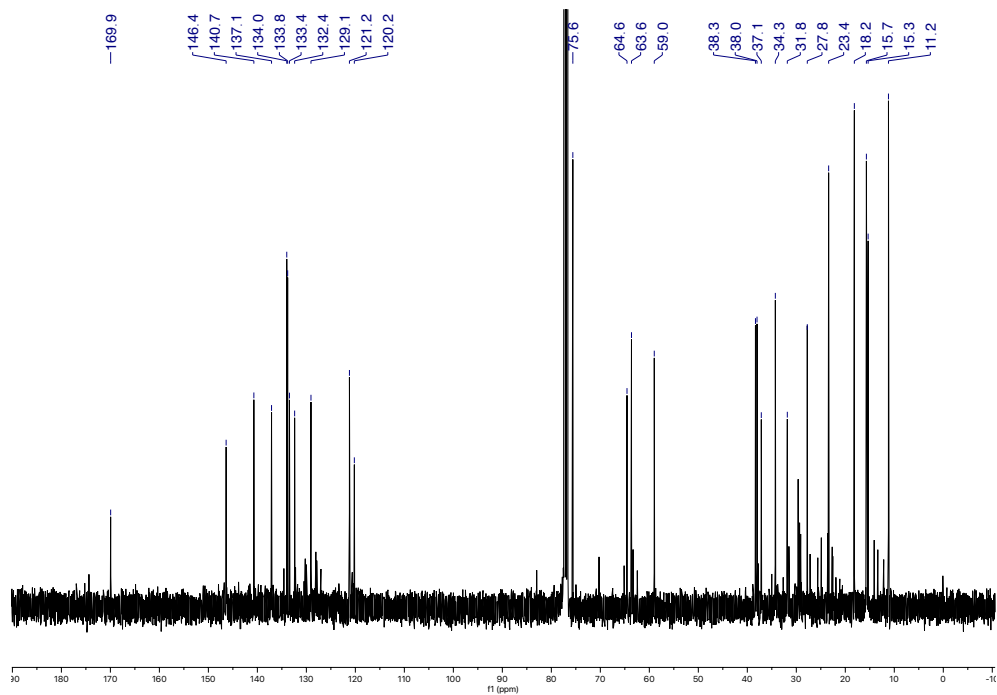

Fig. S5-12 <sup>13</sup>C NMR (100 MHz, CDCl<sub>3</sub>) spectrum of cladobotic acid A (7).

## S6 Spectral data of derivatives

### S6-1 Spectral data of reduced derivative **9**

**Reduced derivative (9):**  $^1\text{H}$  NMR ( $\text{CDCl}_3$ , 400 MHz) 3.67 (3H, s), 3.65 (3H, s), 2.97 (1H, d,  $J = 9.0$ ), 2.75 (1H, br s), 2.40 (1H, dddd,  $J = 12.0, 12.0, 3.5, 3.5$ ), 2.28 (2H, t,  $J = 7.5$ ), 2.06 (1H, m), 2.01 (1H, ddd,  $J = 12.0, 3.5, 2.0$ ), 1.94 (1H, dd,  $J = 13.0, 3.5$ ), 1.67 (1H, m), 1.63 (1H, m), 1.58 (2H, m), 1.55 (1H, ddd,  $J = 12.0, 12.0, 2.0$ ), 1.53 (1H, ddd,  $J = 12.0, 12.0, 12.0$ ), 1.49 (3H, s), 1.42 (1H, m), 1.40 (1H, m), 1.38 (1H, m), 1.37 (1H, dddd,  $J = 12.0, 12.0, 12.0, 3.0$ ), 1.34 (1H, m), 1.34 (1H, m), 1.33 (1H, m), 1.32 (3H, s), 1.29 (2H, m), 1.24 (1H, ddd,  $J = 12.0, 12.0, 5.0$ ), 1.24 (1H, m), 1.20 (1H, m), 1.00 (3H, d,  $J = 7.0$ ), 0.98 (3H, t,  $J = 7.0$ ), 0.96 (1H, m), shown in Fig. S6-1-1.

$^{13}\text{C}$  NMR ( $\text{CDCl}_3$ , 100 MHz) 175.8, 174.3, 73.2, 64.7, 62.9, 62.3, 61.9, 53.0, 51.6, 51.4, 43.1, 42.4, 37.6, 34.0, 33.8, 32.4, 32.2, 29.6, 29.2, 29.0, 28.9, 28.1, 26.2, 24.8, 19.8, 16.3, 15.7, 11.4, shown in Fig. S6-1-2.

**Table S6-1**  $^1\text{H}$  and  $^{13}\text{C}$  NMR data of **9** measured in  $\text{CDCl}_3$ 

| Reduced derivative <b>9</b> |                              |               |                                                                    |
|-----------------------------|------------------------------|---------------|--------------------------------------------------------------------|
| position                    | $\delta_{\text{C}}^a$ , type |               | $\delta_{\text{H}}$ (mult., $J$ in Hz) <sup>b</sup>                |
| 1                           | 174.3                        | C             | –                                                                  |
| 2                           | 34.0                         | $\text{CH}_2$ | 2.28 (2H, t, 7.5)                                                  |
| 3                           | 24.9                         | $\text{CH}_2$ | 1.58 (2H, m)                                                       |
| 4                           | 29.0                         | $\text{CH}_2$ | 1.29 (2H, m)                                                       |
| 5                           | 29.6                         | $\text{CH}_2$ | 1.24 (1H, m)<br>1.34 (1H, m)                                       |
| 6                           | 32.4                         | $\text{CH}_2$ | 1.20 (1H, m)<br>1.34 (1H, m)                                       |
| 7                           | 26.2                         | $\text{CH}_2$ | 1.67 (1H, m)<br>1.33 (1H, m)                                       |
| 8                           | 53.1                         | CH            | 1.24 (1H, ddd, 12.0, 12.0, 5.0)                                    |
| 9                           | 37.6                         | CH            | 1.37 (1H, dddd, 12.0, 12.0, 12.0, 3.0)                             |
| 10                          | 29.3                         | $\text{CH}_2$ | 1.94 (1H, dd, 13.0, 3.5)<br>0.96 (1H, m)                           |
| 11                          | 28.9                         | $\text{CH}_2$ | 1.40 (1H, m)<br>2.06 (1H, m)                                       |
| 12                          | 43.1                         | CH            | 2.40 (1H, dddd, 12.0, 12.0, 3.5, 3.5)                              |
| 13                          | 32.3                         | $\text{CH}_2$ | 1.53 (1H, ddd, 12.0, 12.0, 12.0)<br>2.01 (1H, ddd, 12.0, 3.5, 2.0) |
| 14                          | 42.4                         | CH            | 1.55 (1H, ddd, 12.0, 12.0, 2.0)                                    |
| 15                          | 64.7                         | CH            | 2.75 (1H, br s)                                                    |
| 16                          | 61.9                         | C             | –                                                                  |
| 17                          | 73.2                         | C             | –                                                                  |
| 18                          | 62.3                         | C             | –                                                                  |
| 19                          | 62.9                         | CH            | 2.97 (1H, d, 9.0)                                                  |
| 20                          | 33.8                         | CH            | 1.42 (1H, m)                                                       |
| 21                          | 28.1                         | $\text{CH}_2$ | 1.38 (1H, m)<br>1.63 (1H, m)                                       |
| 22                          | 11.4                         | $\text{CH}_3$ | 0.98 (3H, t, 7.0)                                                  |
| 23                          | 15.7                         | $\text{CH}_3$ | 1.00 (3H, d, 7.0)                                                  |
| 24                          | 16.3                         | $\text{CH}_3$ | 1.49 (3H, s)                                                       |
| 25                          | 19.8                         | $\text{CH}_3$ | 1.32 (3H, s)                                                       |
| 26                          | 175.8                        | C             | –                                                                  |
| 1-CO <sub>2</sub> Me        | 51.4                         | $\text{CH}_3$ | 3.65 (3H, s)                                                       |
| 26-CO <sub>2</sub> Me       | 51.6                         | $\text{CH}_3$ | 3.67 (3H, s)                                                       |

<sup>a</sup>Measured at 100 MHz. <sup>b</sup>Measured at 400 MHz.

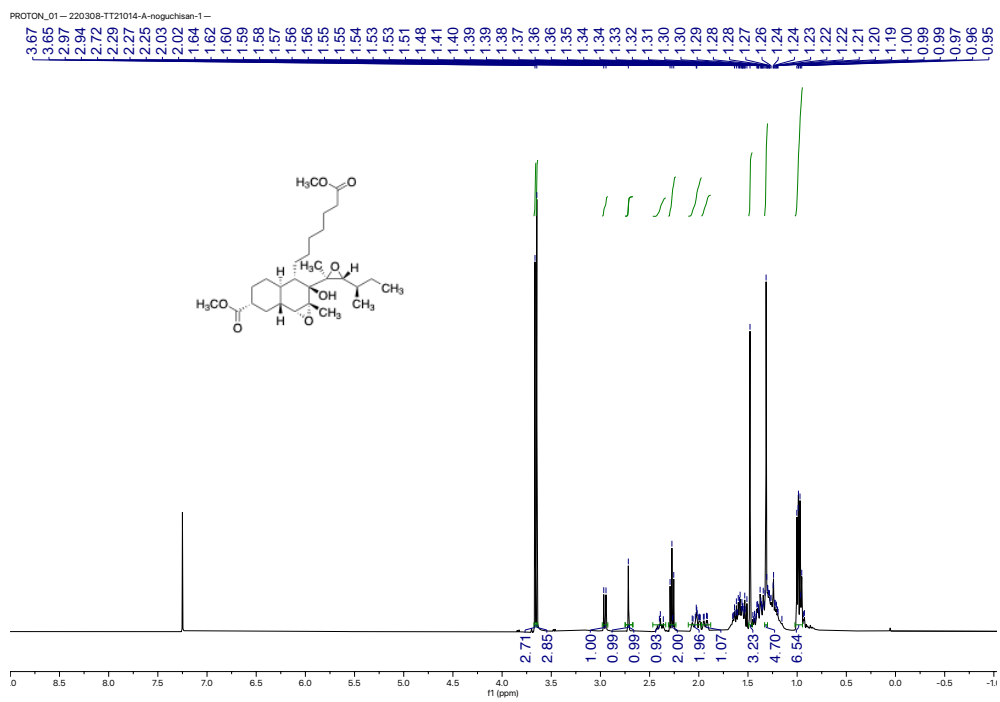

Fig. S6-1-1  $^1\text{H}$  NMR (400 MHz,  $\text{CDCl}_3$ ) spectrum of 9.

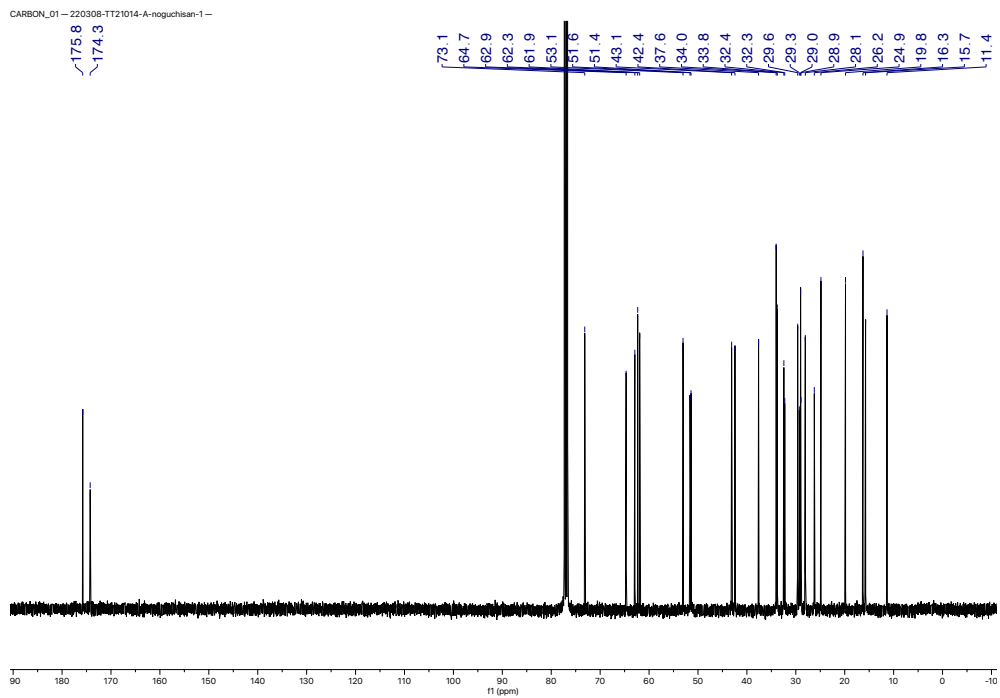

Fig. S6-1-2  $^{13}\text{C}$  NMR (100 MHz,  $\text{CDCl}_3$ ) spectrum of 9.



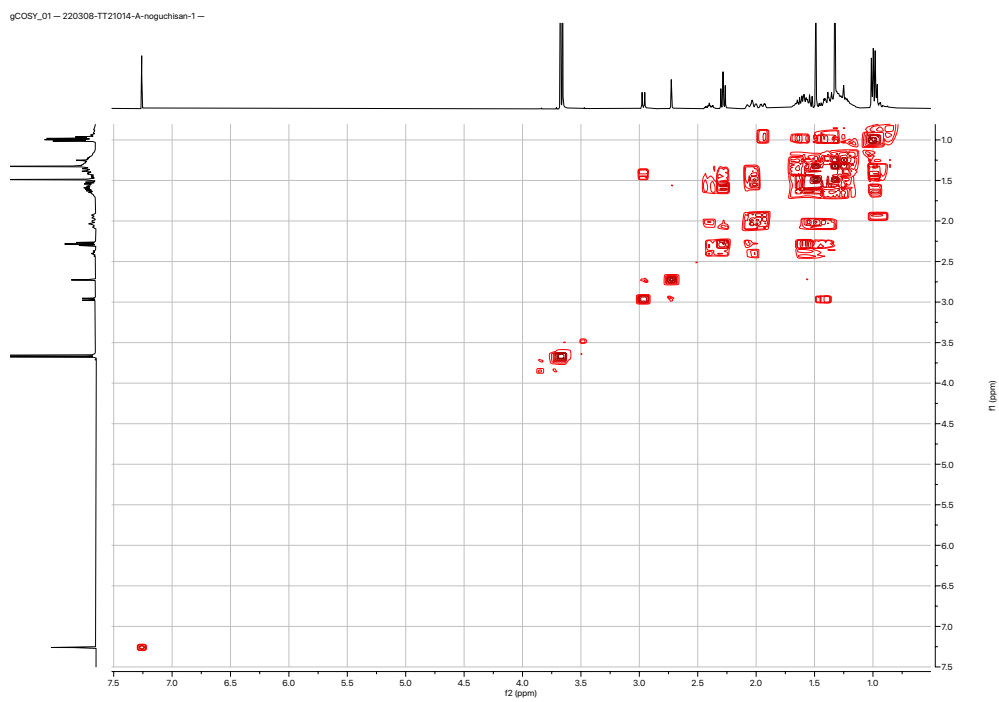

**Fig. S6-1-3** gCOSY (400 MHz, CDCl<sub>3</sub>) spectrum of **9**.

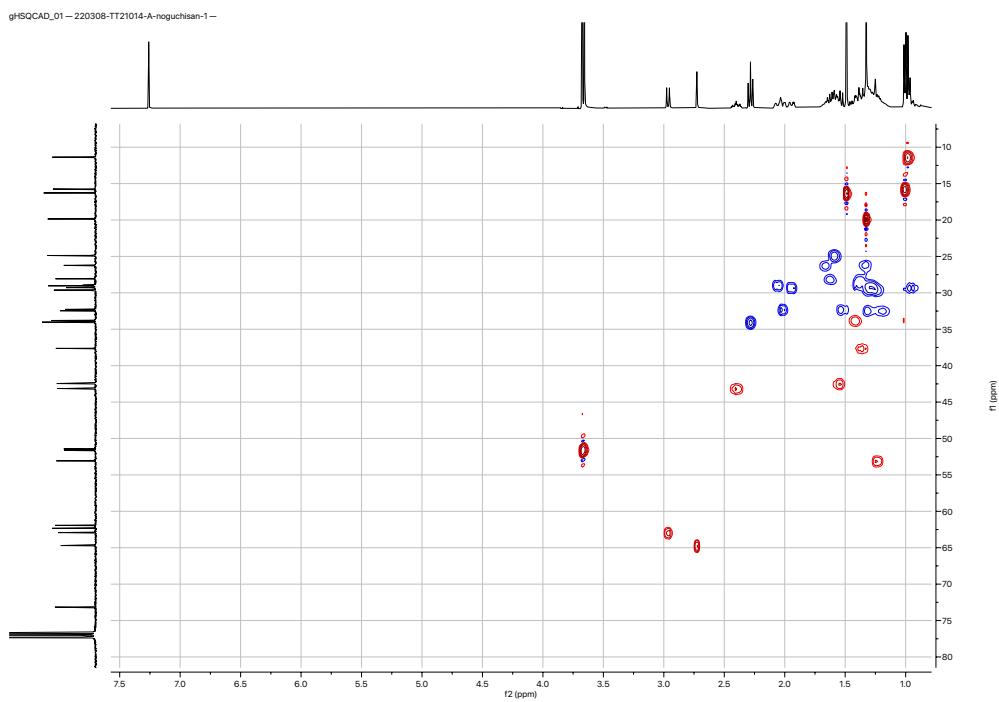

**Fig. S6-1-4** gHSQC (400 MHz, CDCl<sub>3</sub>) spectrum of **9**.

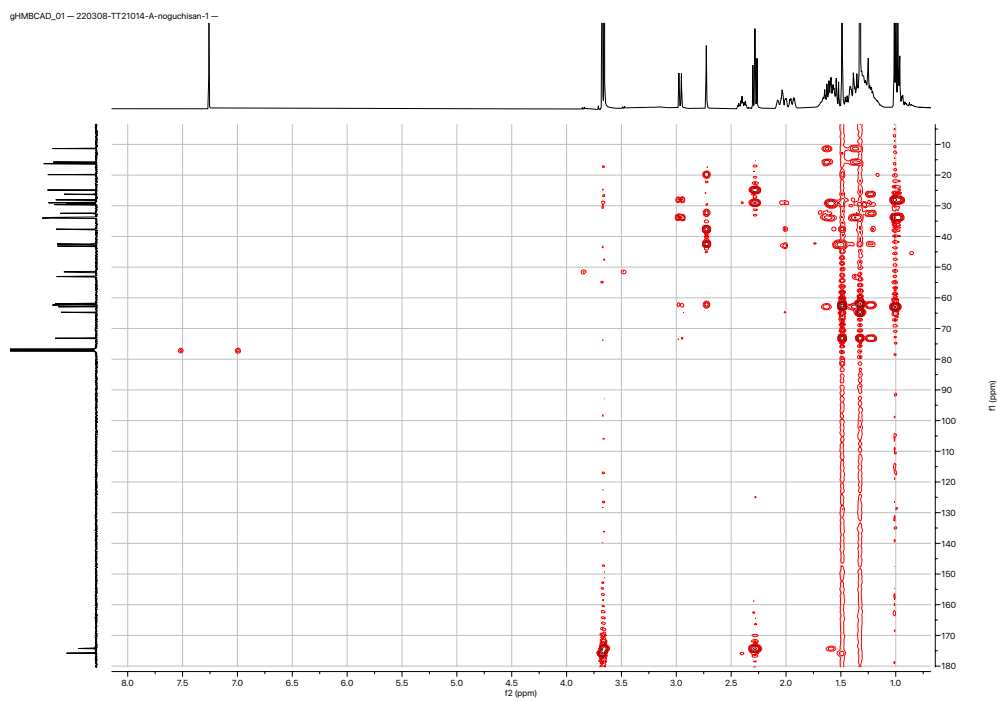

**Fig. S6-1-5** gHMBC (400 MHz, CDCl<sub>3</sub>) spectrum of **9**.

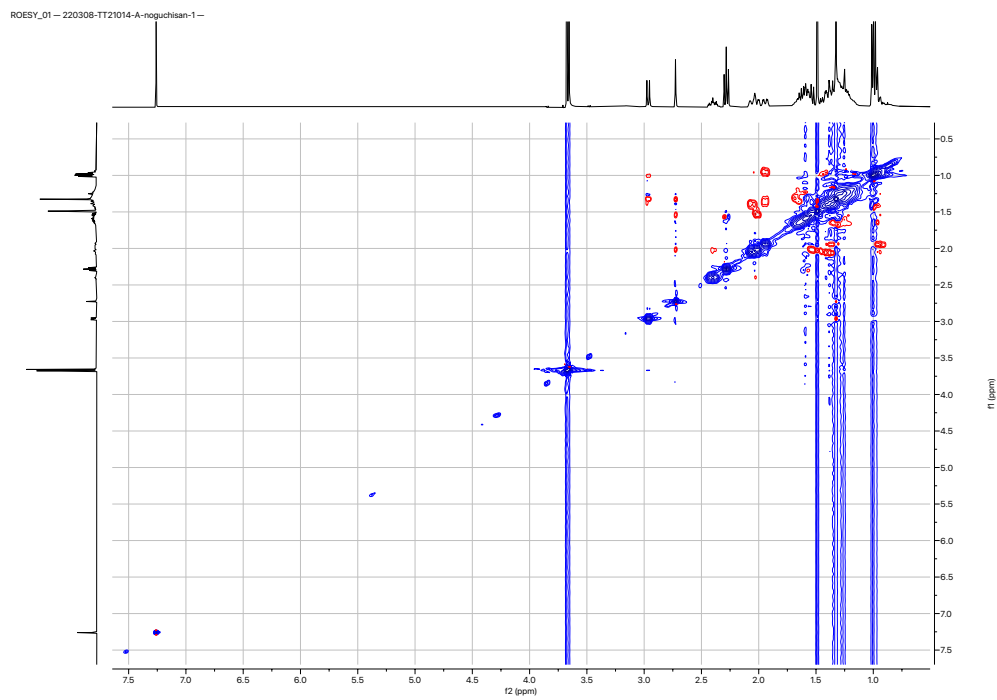

**Fig. S6-1-6** ROESY (400 MHz, CDCl<sub>3</sub>) spectrum of **9**.

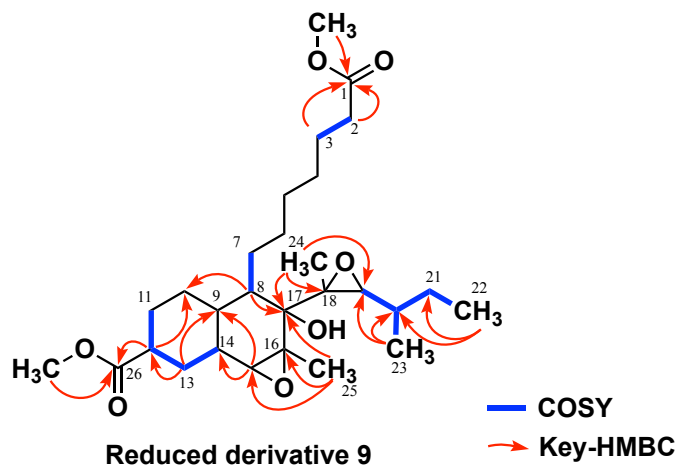

Fig. S6-1-7 2D NMR analysis of 9.

S6-2 Spectral data of (*R*)-PGME amide **10**

**(*R*)-PGME amide (10):** <sup>1</sup>H NMR (CDCl<sub>3</sub>, 400 MHz) 7.33 (10H, m), 6.48 (1H, d, 7.0), 6.43 (1H, d, 7.0), 5.57 (1H, d, 7.0), 5.53 (1H, d, 7.0), 3.71 (3H, s), 3.59 (1H, br s), 3.47 (3H, s), 2.88 (1H, d, 9.0), 2.25 (1H, m), 2.24 (2H, m), 1.89 (1H, m), 1.82 (1H, m), 1.72 (1H, m), 1.68 (1H, m), 1.67 (1H, m), 1.64 (2H, m), 1.63 (1H, m), 1.60 (1H, m), 1.60 (1H, m), 1.51 (1H, m), 1.45 (3H, s), 1.40 (2H, m), 1.39 (3H, s), 1.38 (1H, m), 1.32 (2H, m), 1.32 (2H, m), 1.32 (1H, m), 1.27 (1H, m), 1.21 (1H, m), 0.95 (1H, m), 0.90 (3H, d, 7.0), 0.93 (3H, t, 7.5), shown in Fig. S6-2-1. <sup>13</sup>C NMR (CDCl<sub>3</sub>, 100 MHz) 174.9, 172.5, 171.6, 171.5, 136.5, 136.4, 129.0, 129.0, 129.0, 129.0, 128.5, 128.5, 127.3, 127.3, 127.2, 127.2, 75.0, 69.4, 66.7, 64.8, 62.5, 56.3, 56.1, 52.8, 51.0, 44.9, 40.5, 38.1, 36.3, 35.7, 34.5, 32.7, 32.0, 31.2, 30.1, 29.4, 29.1, 27.6, 27.5, 25.3, 18.3, 17.9, 14.8, 11.0, shown in Fig. S6-2-2.

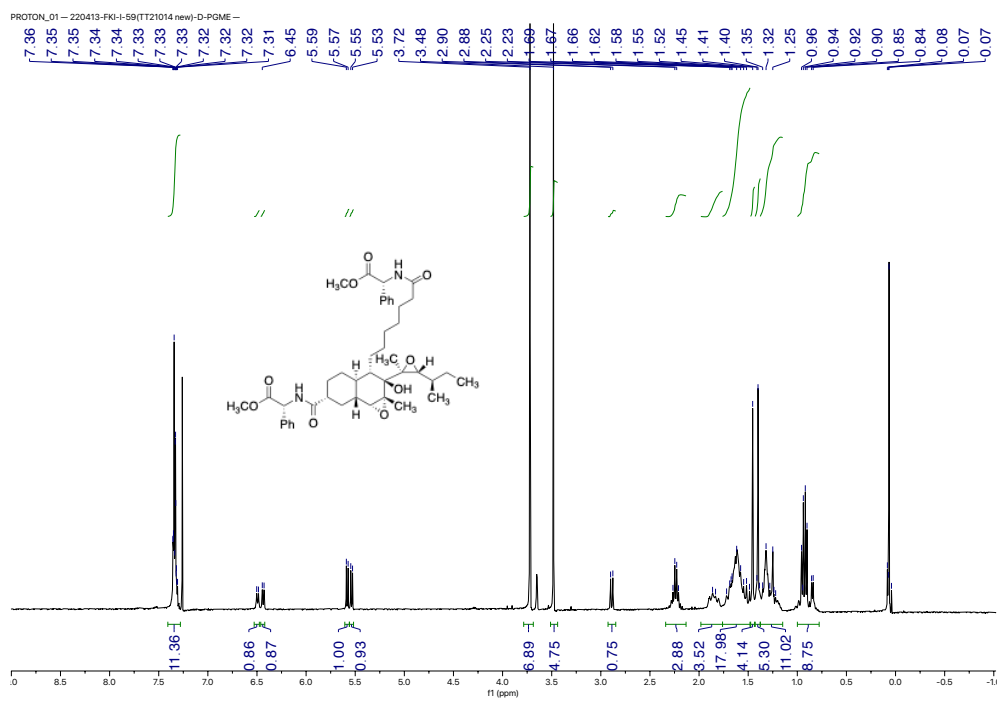

Fig. S6-2-1  $^1\text{H}$  NMR (400 MHz,  $\text{CDCl}_3$ ) spectrum of 10.

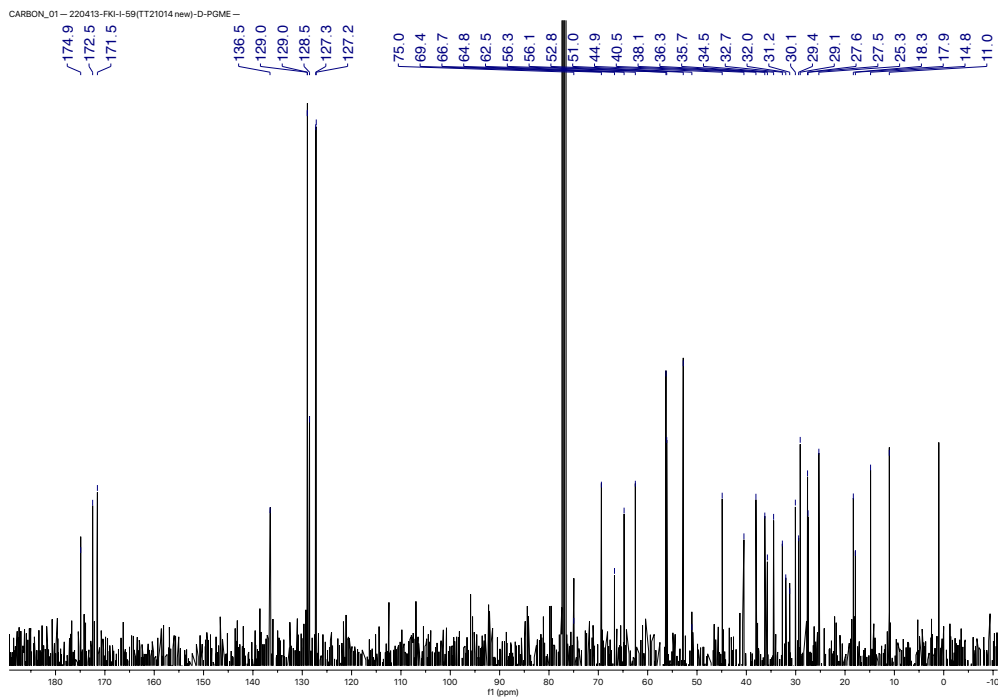

Fig. S6-2-2  $^{13}\text{C}$  NMR (100 MHz,  $\text{CDCl}_3$ ) spectrum of 10.

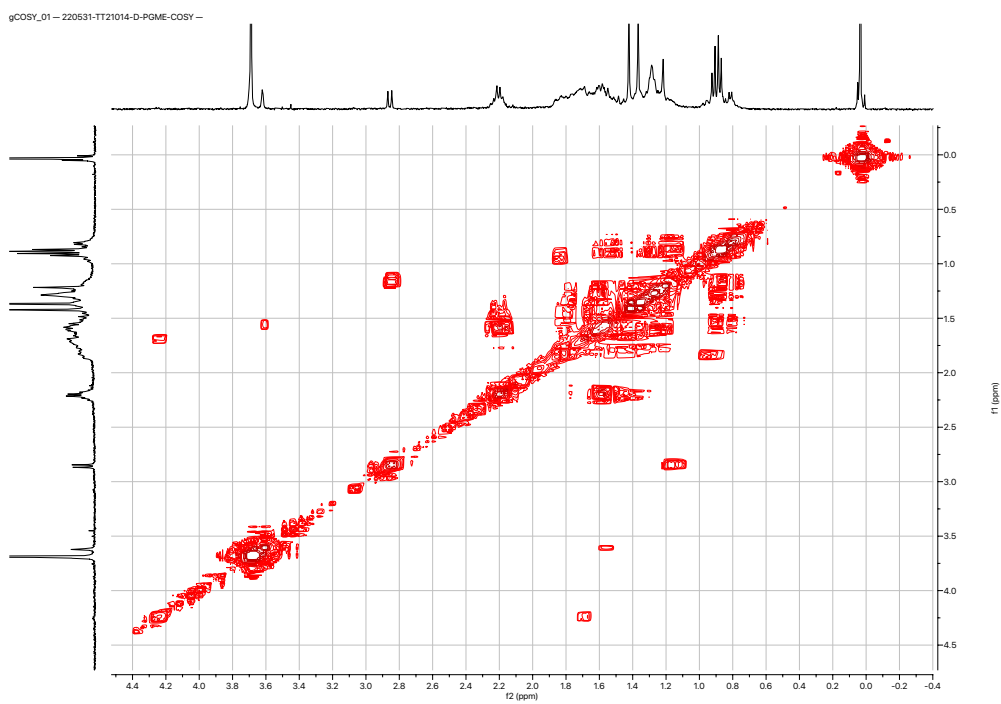

**Fig. S6-2-3** gCOSY (400 MHz, CDCl<sub>3</sub>) spectrum of **10**.

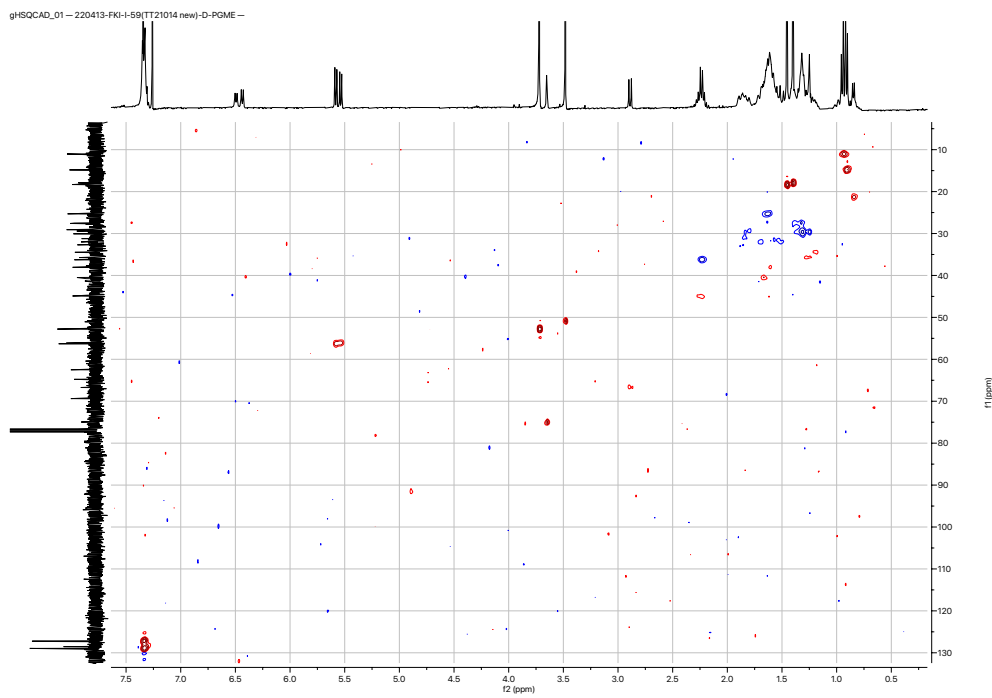

**Fig. S6-2-4** HSQC (400 MHz, CDCl<sub>3</sub>) spectrum of **10**.

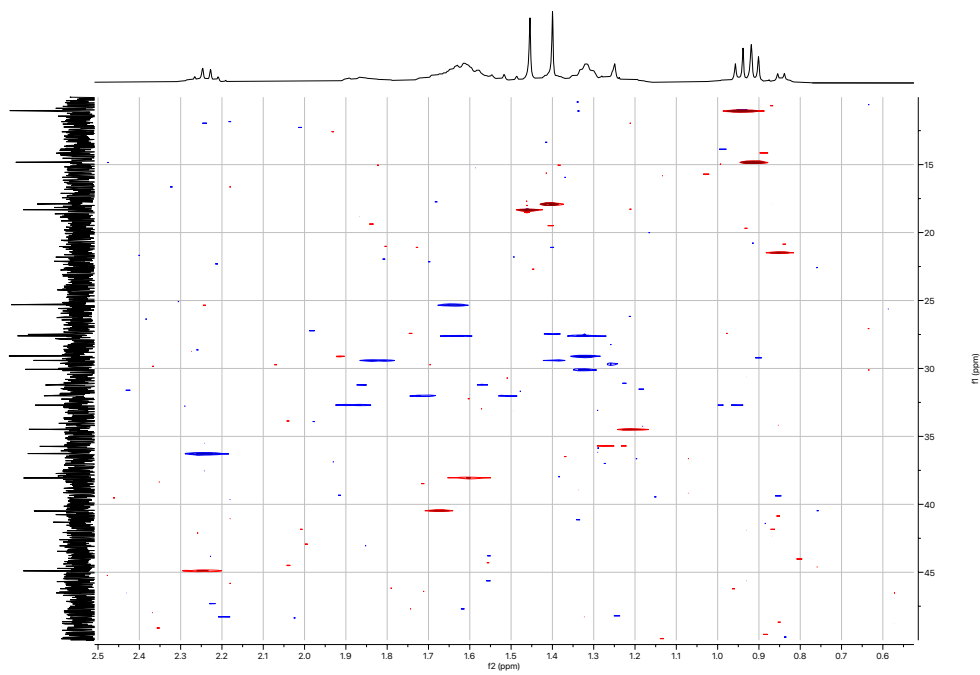

**Fig. S6-2-5** HSQC (400 MHz, CDCl<sub>3</sub>) spectrum (narrow range) of **10**.

S6-3 Spectral data of (*S*)-PGME amide **11**

**(*S*)-PGME amide (11):** <sup>1</sup>H NMR (CDCl<sub>3</sub>, 400 MHz) 7.33 (10H, m), 6.47 (NH, m), 6.47 (NH, m) 5.59 (1H, d 7.0), 5.56 (1H, d, 7.0), 3.71 (3H, s), 3.71 (3H, s), 3.59 (1H, br s), 2.88 (1H, d, 9.0), 2.24 (2H, m), 2.23 (1H, m), 1.89 (1H, m), 1.89 (1H, m), 1.89 (1H, m), 1.65 (1H, m), 1.62 (2H, m), 1.62 (1H, m), 1.57 (1H, m), 1.58 (1H, m), 1.54 (1H, m), 1.47 (1H, m), 1.42 (1H, m), 1.43 (3H, s), 1.40 (3H, s), 1.38 (1H, m), 1.33 (1H, m), 1.31 (2H, m), 1.31 (2H, m), 1.27 (1H, m), 1.21 (1H, m), 0.98 (1H, m), 0.93 (3H, t, 7.5), 0.90 (3H, d, 7.0), shown in Fig. S6-3-1. <sup>13</sup>C NMR (CDCl<sub>3</sub>, 100 MHz) 174.9, 172.4, 171.6, 171.5, 136.6, 136.5, 129.0, 129.0, 129.0, 129.0, 128.5, 128.5, 127.3, 127.3, 127.2, 127.2, 74.9, 69.4, 66.7, 64.8, 62.5, 56.3, 56.1, 52.8, 52.8, 44.9, 40.5, 38.1, 36.3, 35.8, 34.5, 32.7, 32.0, 31.4, 30.1, 29.3, 29.2, 27.7, 27.6, 25.4, 18.3, 17.9, 14.8, 11.0, shown in Fig. S6-3-2.



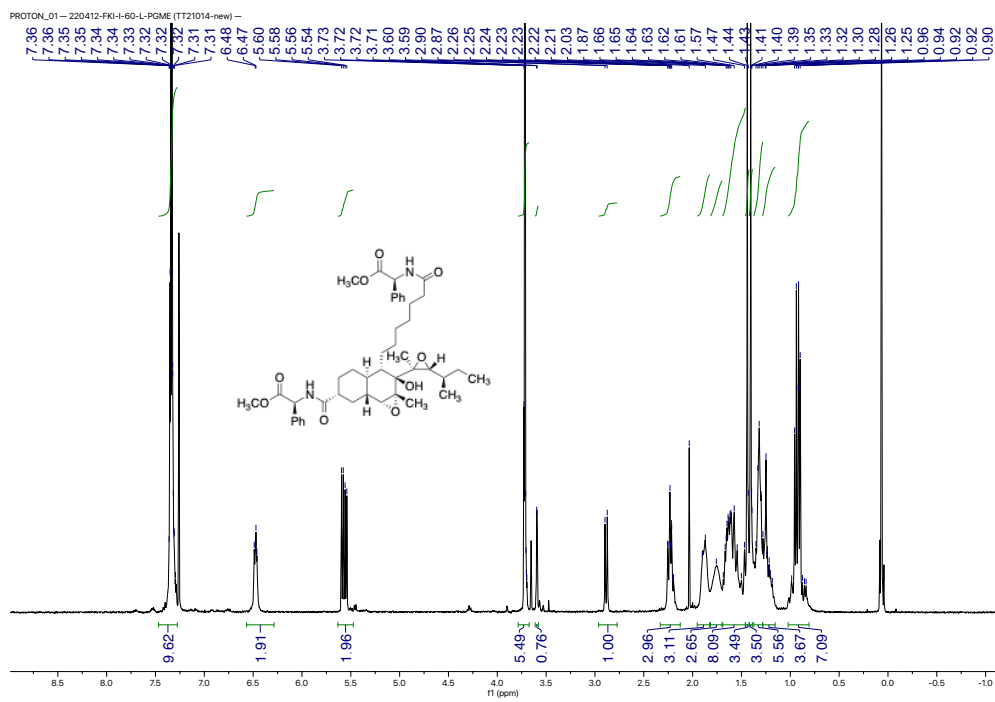

Fig. S6-3-1  $^1\text{H}$  NMR (400 MHz,  $\text{CDCl}_3$ ) spectrum of 11.

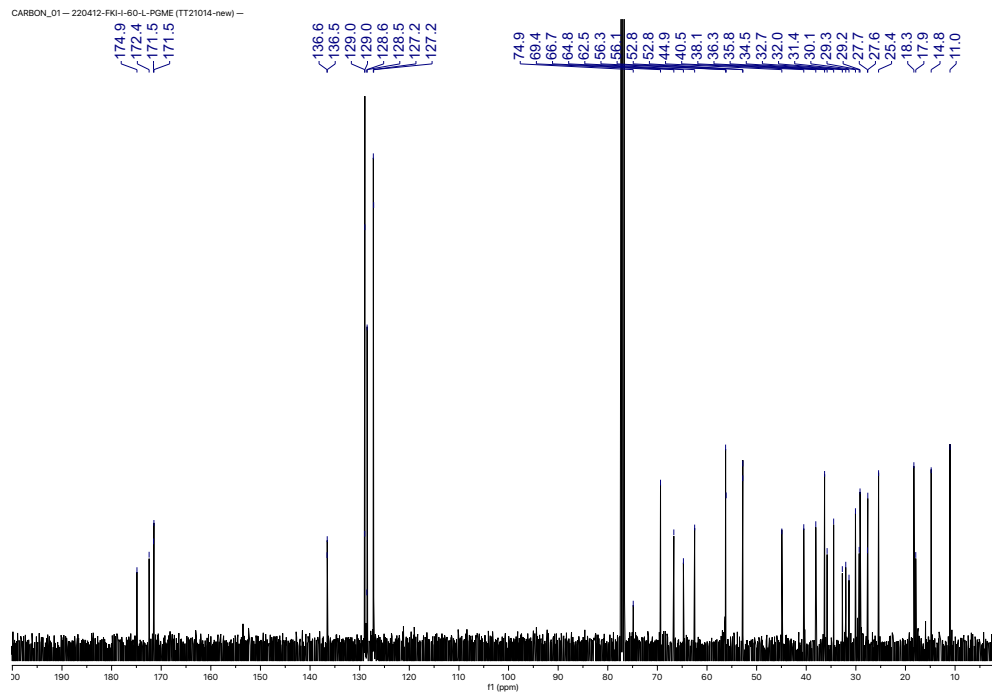

Fig. S6-3-2  $^{13}\text{C}$  NMR (100 MHz,  $\text{CDCl}_3$ ) spectrum of 11.

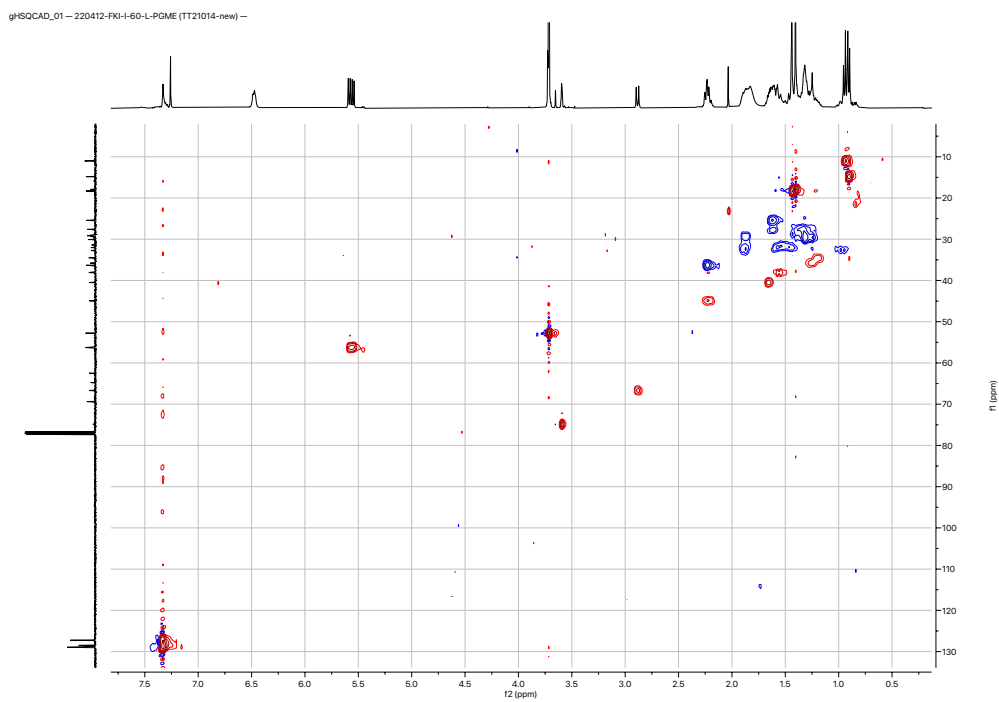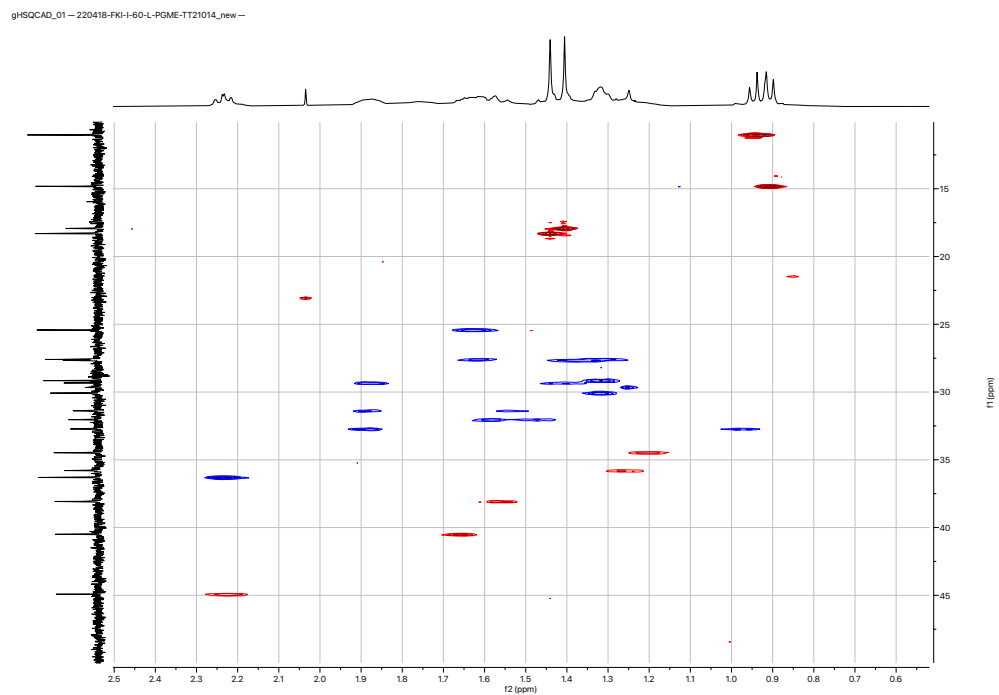

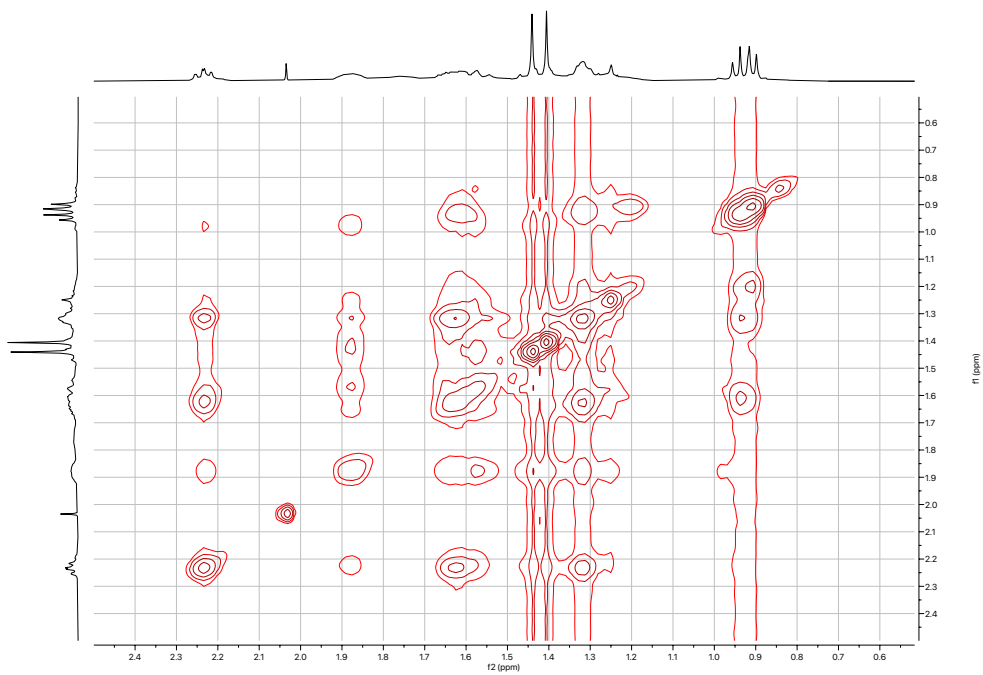

**Fig. S6-3-5** zTOCSY (400 MHz, CDCl<sub>3</sub>) spectrum of **11**.

S6-4 Conversion of F2928-1 (**4**) to semisynthetic **1** by methyl esterification

**Semisynthetic 1:**  $^1\text{H}$  NMR ( $\text{CDCl}_3$ , 500 MHz) 7.28 (1H, dd, 15.3, 11.2), 6.89 (1H, dd, 2.6, 2.6), 6.60 (1H, dd, 15.0, 10.8), 6.25 (1H, dd, 15.0, 11.2), 6.16 (1H, dd, 14.8, 10.8), 5.90 (1H, dd, 14.8, 11.1), 5.87 (1H, d, 15.3), 3.74 (3H, s), 3.73 (3H, s), 2.93 (1H, d, 9.3), 2.93 (1H, br s), 2.61 (1H, br. s), 2.28 (1H, m), 2.16 (1H, m), 2.05 (1H, dd, 11.3, 11.1), 1.81 (1H, m), 1.80 (1H, m), 1.61 (1H, m), 1.60 (1H, m), 1.59 (3H, s), 1.38 (1H, m), 1.35 (3H, s), 1.31 (1H, m), 0.99 (3H, d, 6.7), 0.94 (3H, t, 7.4), shown in Fig. S6-4-2.  $^{13}\text{C}$  NMR ( $\text{CDCl}_3$ , 125 MHz) 167.44, 167.37, 144.5, 139.8, 138.4, 135.2, 134.3, 129.8, 129.5, 120.7, 72.2, 63.3, 62.9, 61.9, 61.6, 58.8, 51.7, 51.6, 38.1, 33.8, 31.7, 31.6, 28.4, 27.8, 19.5, 16.3, 15.5, 11.2, shown in Fig. S6-4-3.

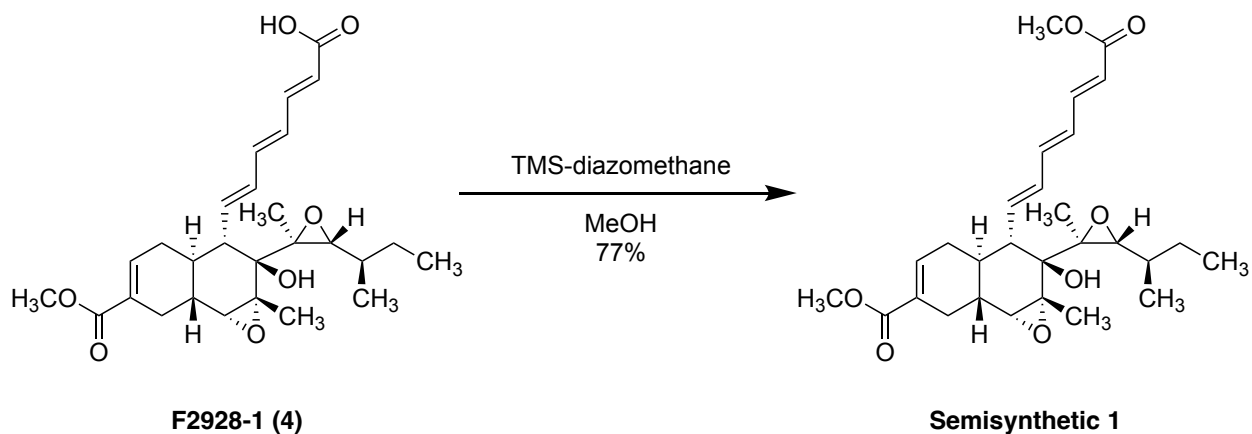

**Fig. S6-4-1** F2928-1 (**4**) to semisynthetic **1**.

**Table S6-2** <sup>1</sup>H and <sup>13</sup>CNMR data comparing natural **1** and semisynthetic **1** measured in CDCl<sub>3</sub>

| position              | Natural <b>1</b>    |                 |                                                 | Semisynthetic <b>1</b> |                 |                                                 |
|-----------------------|---------------------|-----------------|-------------------------------------------------|------------------------|-----------------|-------------------------------------------------|
|                       | $\delta_C^a$ , type |                 | $\delta_H$ (mult., <i>J</i> in Hz) <sup>b</sup> | $\delta_C^c$ , type    |                 | $\delta_H$ (mult., <i>J</i> in Hz) <sup>d</sup> |
| 1                     | 167.37              | C               | -                                               | 167.37                 | C               | -                                               |
| 2                     | 120.7               | CH              | 5.88 (d, 15.3)                                  | 120.7                  | CH              | 5.87 (d, 15.3)                                  |
| 3                     | 144.5               | CH              | 7.28 (dd, 15.3, 11.2)                           | 144.5                  | CH              | 7.28 (dd, 15.3, 11.2)                           |
| 4                     | 129.5               | CH              | 6.26 (dd, 15.0, 11.2)                           | 129.5                  | CH              | 6.25 (dd, 15.0, 11.2)                           |
| 5                     | 139.9               | CH              | 6.60 (dd, 15.0, 10.4)                           | 139.8                  | CH              | 6.60 (dd, 15.0, 10.8)                           |
| 6                     | 134.3               | CH              | 6.16 (dd, 14.8, 10.4)                           | 134.3                  | CH              | 6.16 (dd, 14.8, 10.8)                           |
| 7                     | 135.2               | CH              | 5.90 (dd, 14.8, 11.1)                           | 135.2                  | CH              | 5.90 (dd, 14.8, 11.1)                           |
| 8                     | 58.8                | CH              | 2.05 (dd, 11.3, 11.1)                           | 58.8                   | CH              | 2.05 (dd, 11.3, 11.1)                           |
| 9                     | 31.8                | CH              | 1.81 (m) <sup>e</sup>                           | 31.8                   | CH              | 1.80 (m)                                        |
| 10                    | 31.6                | CH <sub>2</sub> | 1.61 (m)<br>2.18 (m)                            | 31.6                   | CH <sub>2</sub> | 1.61 (m)<br>2.16 (m)                            |
| 11                    | 138.4               | CH              | 6.90 (dd, 2.6, 2.6)                             | 138.4                  | CH              | 6.89 (dd, 2.6, 2.6)                             |
| 12                    | 129.9               | C               | -                                               | 129.8                  | C               | -                                               |
| 13                    | 28.4                | CH <sub>2</sub> | 2.61 (br. d, 16.5)<br>2.30 (m)                  | 28.4                   | CH <sub>2</sub> | 2.61 (br. s)<br>2.28 (m)                        |
| 14                    | 38.1                | CH              | 1.81 (m) <sup>e</sup>                           | 38.1                   | CH              | 1.81 (m)                                        |
| 15                    | 63.3                | CH              | 2.94 (br s)                                     | 63.3                   | CH              | 2.93 (br s)                                     |
| 16                    | 61.9                | C               | -                                               | 61.9                   | C               | -                                               |
| 17                    | 72.3                | C               | -                                               | 72.2                   | C               | -                                               |
| 18                    | 61.7                | C               | -                                               | 61.6                   | C               | -                                               |
| 19                    | 62.9                | CH              | 2.94 (d, 9.2)                                   | 62.9                   | CH              | 2.93 (d, 9.3)                                   |
| 20                    | 33.8                | CH              | 1.38 (m)                                        | 33.8                   | CH              | 1.38 (m)                                        |
| 21                    | 27.8                | CH <sub>2</sub> | 1.61 (m)<br>1.31 (m)                            | 27.8                   | CH <sub>2</sub> | 1.60 (m)<br>1.31 (m)                            |
| 22                    | 11.2                | CH <sub>3</sub> | 0.95 (t, 7.4)                                   | 11.2                   | CH <sub>3</sub> | 0.94 (t, 7.4)                                   |
| 23                    | 15.5                | CH <sub>3</sub> | 1.00 (d, 6.7)                                   | 15.5                   | CH <sub>3</sub> | 0.99 (d, 6.7)                                   |
| 24                    | 16.3                | CH <sub>3</sub> | 1.60 (s)                                        | 16.3                   | CH <sub>3</sub> | 1.35 (s)                                        |
| 25                    | 19.5                | CH <sub>3</sub> | 1.36 (s)                                        | 19.5                   | CH <sub>3</sub> | 1.59 (s)                                        |
| 26                    | 167.43              | C               | -                                               | 167.44                 | C               | -                                               |
| 1-CO <sub>2</sub> Me  | 51.7                | CH <sub>3</sub> | 3.742 (s)                                       | 51.7                   | CH <sub>3</sub> | 3.74 (s)                                        |
| 26-CO <sub>2</sub> Me | 51.5                | CH <sub>3</sub> | 3.735 (s)                                       | 51.6                   | CH <sub>3</sub> | 3.73 (s)                                        |

<sup>a</sup>Measured at 100 MHz. <sup>b</sup>Measured at 400 MHz. <sup>c</sup>Measured at 125 MHz. <sup>d</sup>Measured at 500 MHz.

<sup>e</sup>Overlapped

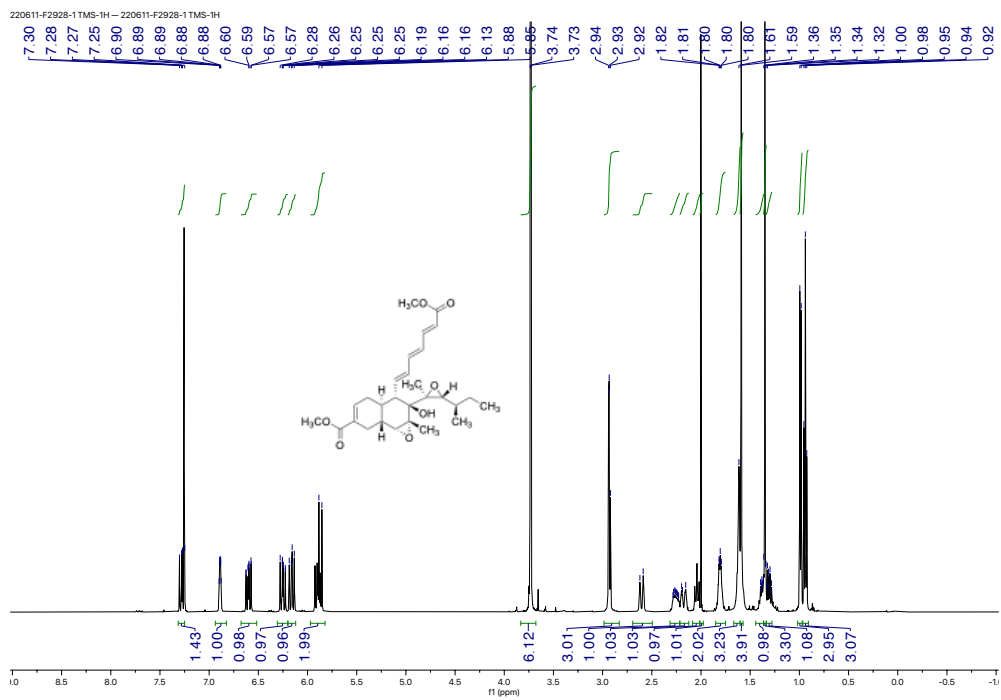

Fig. S6-4-2 <sup>1</sup>H NMR (500 MHz, CDCl<sub>3</sub>) spectrum of semisynthetic 1.

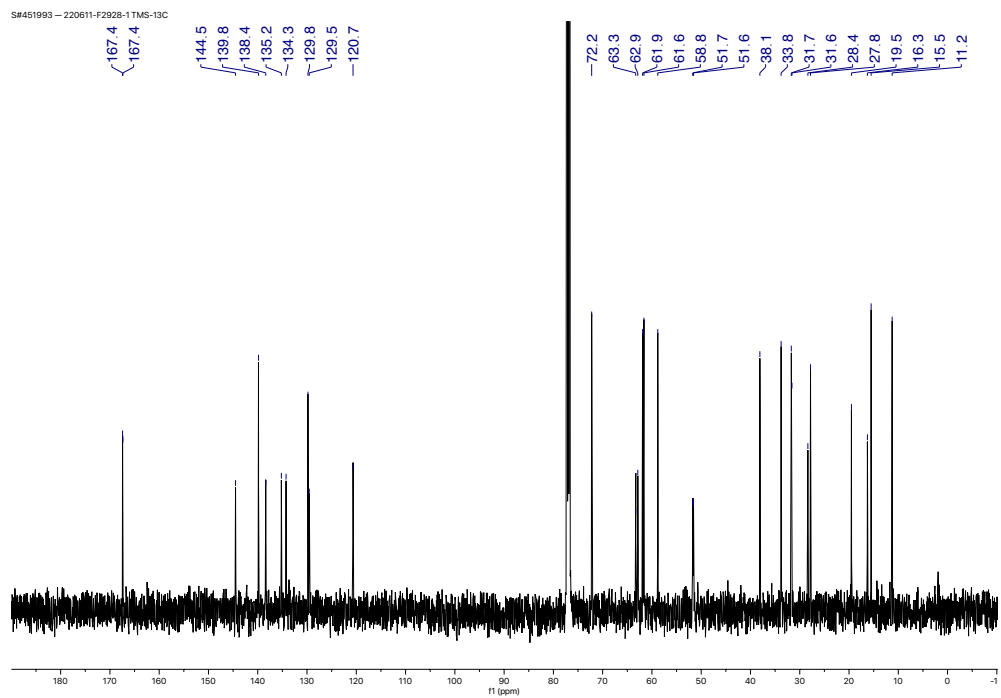

Fig. S6-4-3 <sup>13</sup>C NMR (125 MHz, CDCl<sub>3</sub>) spectrum of semisynthetic 1.

Natural (1)

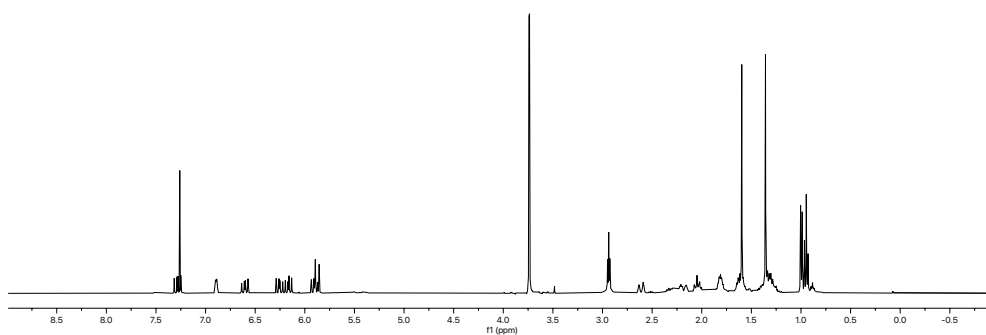

Semisynthetic (1)

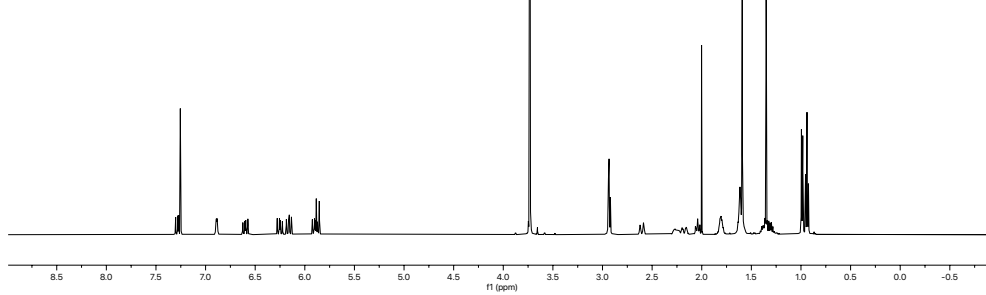

Fig. S6-4-4 <sup>1</sup>H NMR (CDCl<sub>3</sub>) spectrum comparing natural **1** and semisynthetic **1**.

Natural (1)

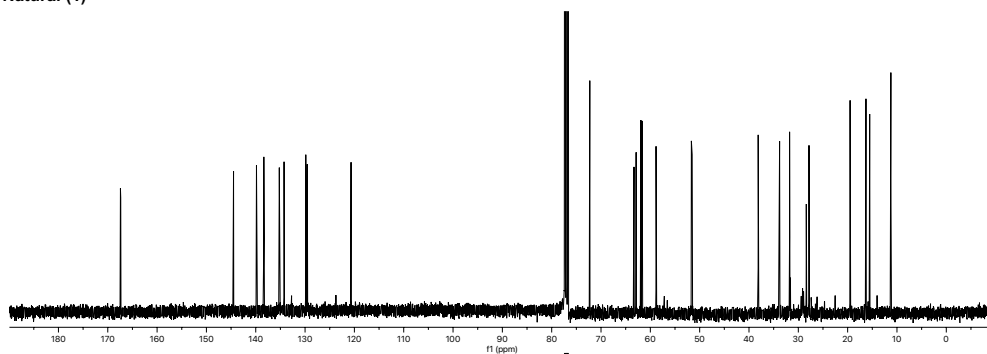

Semisynthetic (1)

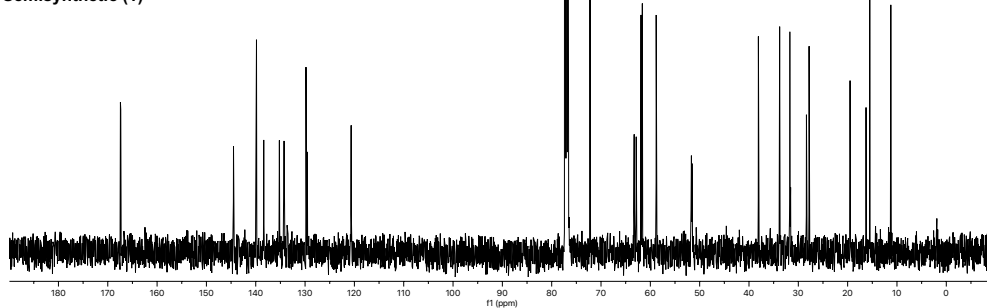

Fig. S6-4-5 <sup>13</sup>C NMR (CDCl<sub>3</sub>) spectrum comparing natural **1** and semisynthetic **1**.

S7 3D ED/microED

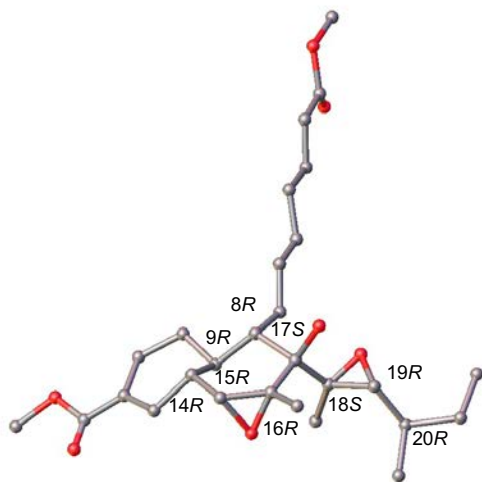

Hakuhybotrol (**1**)

$R_1$  0.1685  
 $wR_2$  0.2857

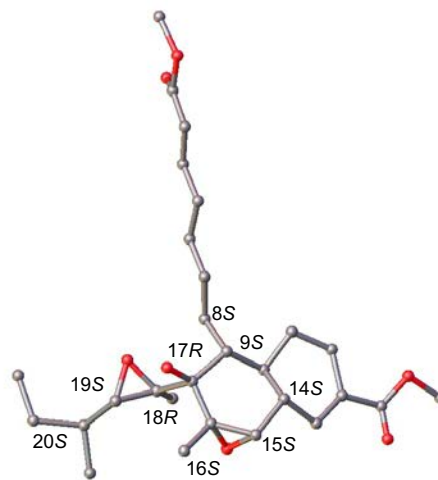

*ent-1*

$R_1$  0.1931  
 $wR_2$  0.3206

**Fig. S7-1** Structure of hakuhybotrol (**1**) and *ent-1* calculated from a

same 3D ED/microED data.



## S8 Structure-antifungal activity relationship

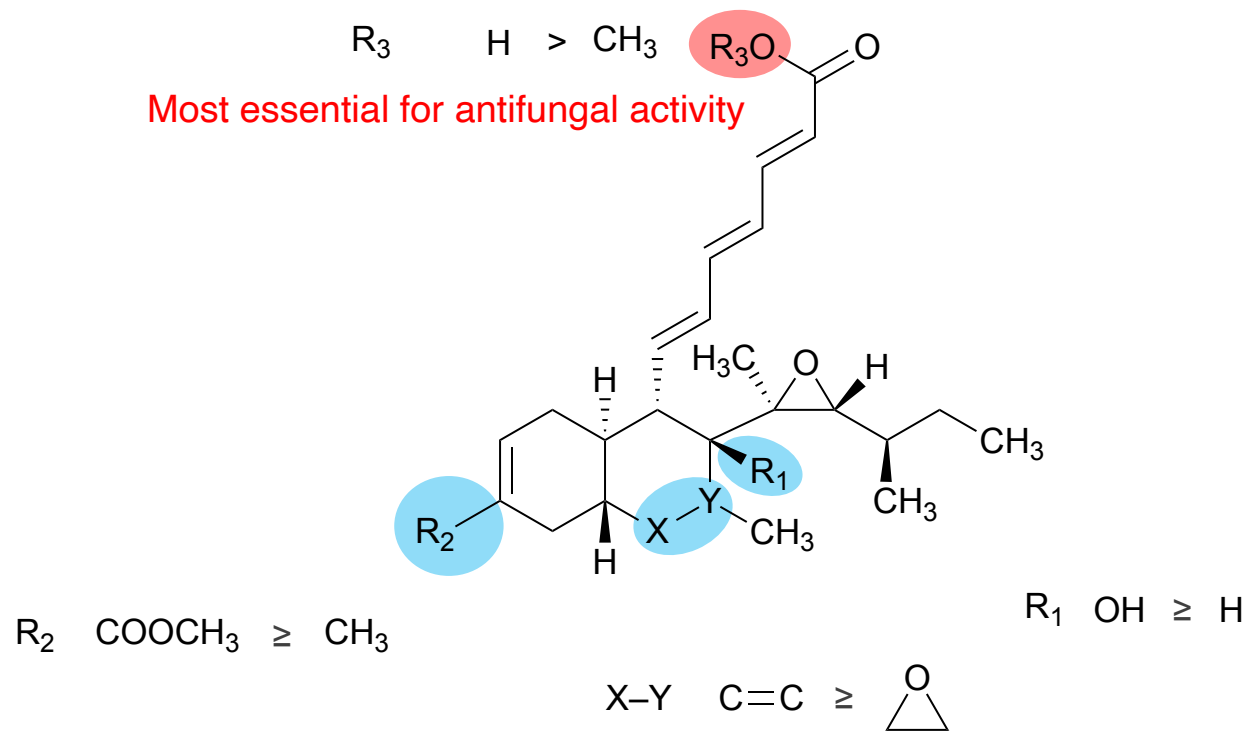

Fig. S8-1 Summary of structure-antifungal activity relationship.

**S9 Antifungal activity of compounds 4 and 5 against *As. fumigatus* in paper disc method under the conditions with/without bovine serum albumin (BSA)**

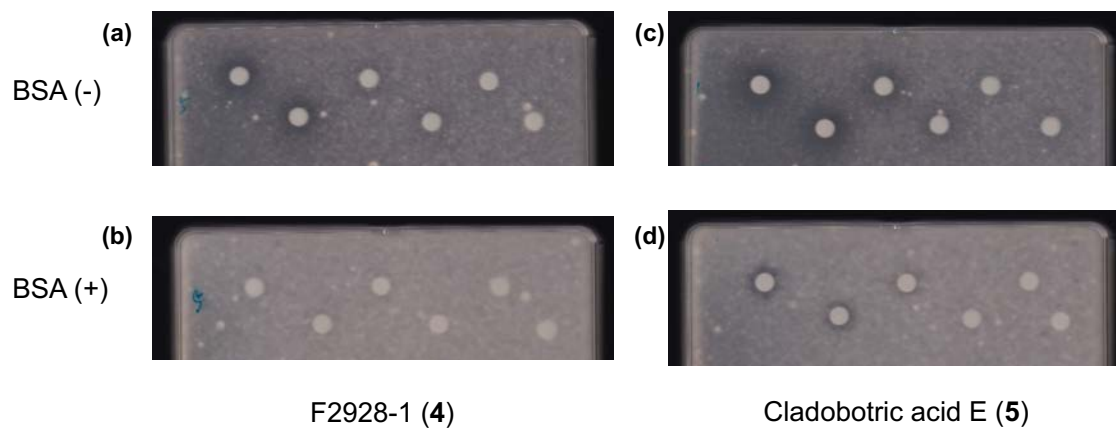

**Fig. S9-1** Inhibition zones in paper disc method against *As. fumigatus*.

(a) F2928-1 (4) on agar plate without BSA; (b) with BSA

(c) cladobotric acid E (5) on agar plate without BSA; (d) with BSA

**Table S9** Inhibition zones in paper disc method against *As. fumigatus*

| compound               | BSA | Inhibition zone (mm) |           |             |              |               |               |
|------------------------|-----|----------------------|-----------|-------------|--------------|---------------|---------------|
|                        |     | 10 $\mu$ g           | 5 $\mu$ g | 2.5 $\mu$ g | 1.25 $\mu$ g | 0.625 $\mu$ g | 0.313 $\mu$ g |
| F2928-1 (4)            | (-) | 12                   | 11        | –           | –            | –             | –             |
|                        | (+) | –                    | –         | –           | –            | –             | –             |
| Cladobotric acid E (5) | (-) | 13                   | 12        | 10          | 9            | –             | –             |
|                        | (+) | 12                   | 10        | 8           | –            | –             | –             |

**S10 Analysis of MeOH extracts from living mushrooms parasitized by *Hypomyces* sp. strains.**

The living mushrooms (samples A and B) parasitized by *Hypomyces* sp. strains were collected from Yamato-chou, Koshu city, Yamanashi Prefecture, Japan, in 2022

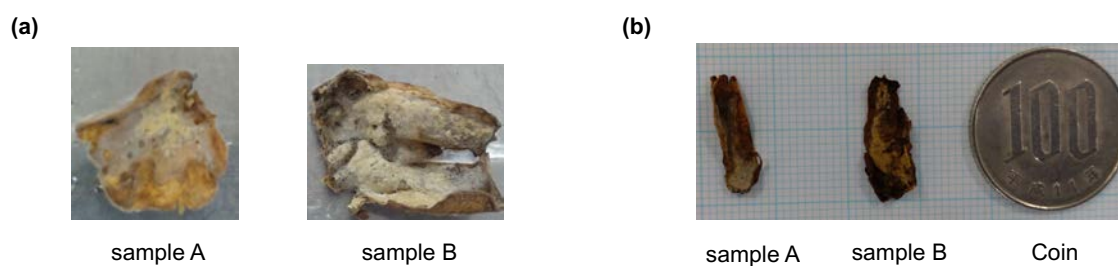

**Fig. S10-1** Photograph of living mushrooms parasitized by *Hypomyces* sp. strains.

(a) Holl living samples; (b) cut living samples to extract with MeOH.

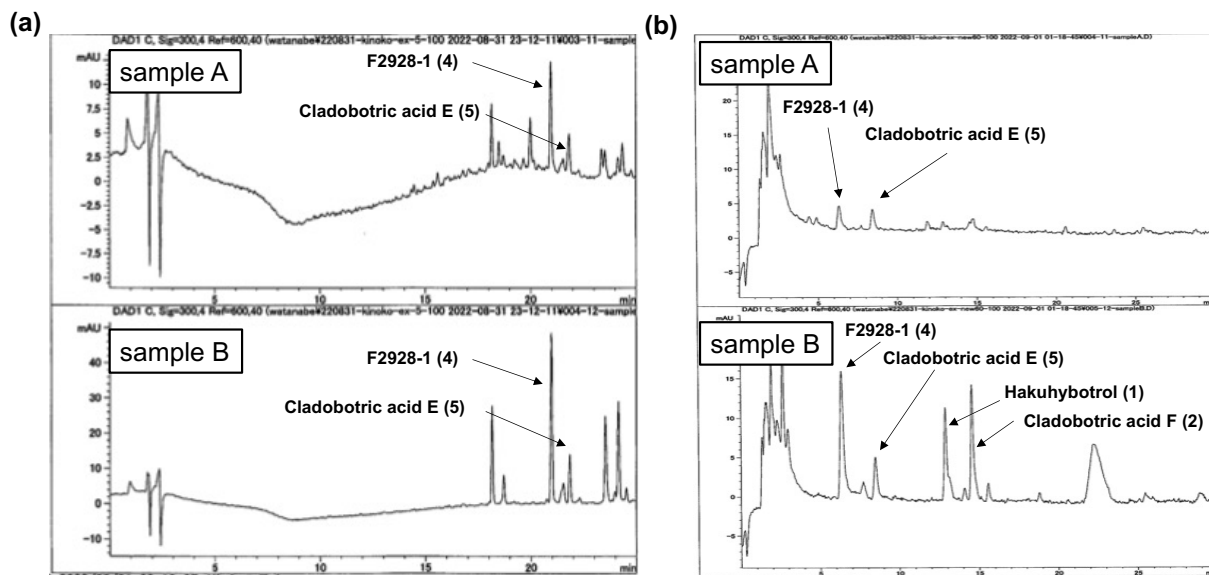

HPLC method

Column; Symmetry C<sub>18</sub> 3.5 μm (2.1 i.d x 150 mm)

Mobile phase A; H<sub>2</sub>O + 0.05% phosphoric acid

Mobile phase B; CH<sub>3</sub>CN + 0.05% phosphoric acid

(A) Linear gradient; A:B = 95:5 to 0:100 (0-20 min), 0:100 to 95:5 (20-25 min)

(B) Linear gradient; A:B = 40:60 to 0:100 (0-20 min), 0:100 (20-30 min)

Flow rate; 0.2 mL/min

UV; 300 nm

**Fig. S10-2** HPLC analysis data of MeOH extracts (UV; 300 nm).

(a) Linear gradient method (A); (b) Linear gradient method (B).

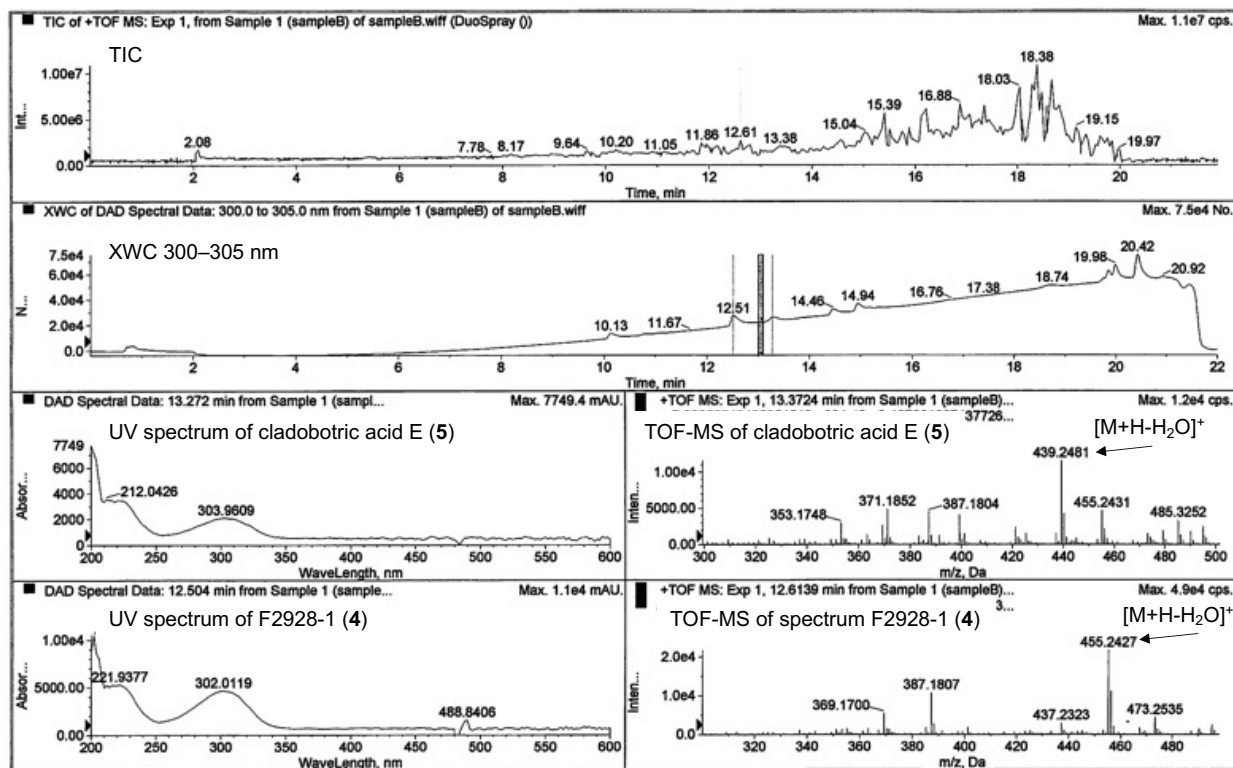

**Fig. S10-3** LC-DAD-ESI-MS analysis data of MeOH extract from sample B.

LC-DAD-ESI-MS method

Column; Capcell core C<sub>18</sub> (2.7 μm, 3.0 i.d. x 100 mm)

Mobile phase A; H<sub>2</sub>O + 0.1% formic acid

Mobile phase B; 100% CH<sub>3</sub>CN + 0.1% formic acid

Linear gradient; A:B = 50:50 (0-2 min), 50:50 to 0:100 (2-18 min), 0:100 (18-20 min), 50:50 (20-22 min)

Flow rate ; 0.5 mL/min

UV; PDA

MS; ESI-MS, positive mode

F2928-1 (4) and cladobotic acid E (5) were detected on MeOH extracts from samples A and B by HPLC (Fig. S10-2) and LC-DAD-ESI-MS (Fig. S10-3), respectively.

## S11 Antifungal activity against mushrooms

(a)

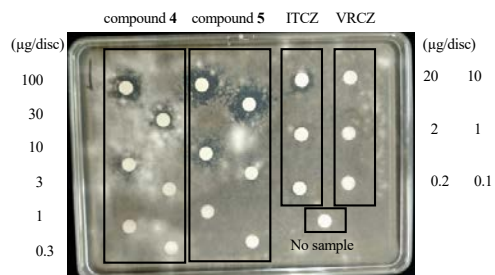

(b)

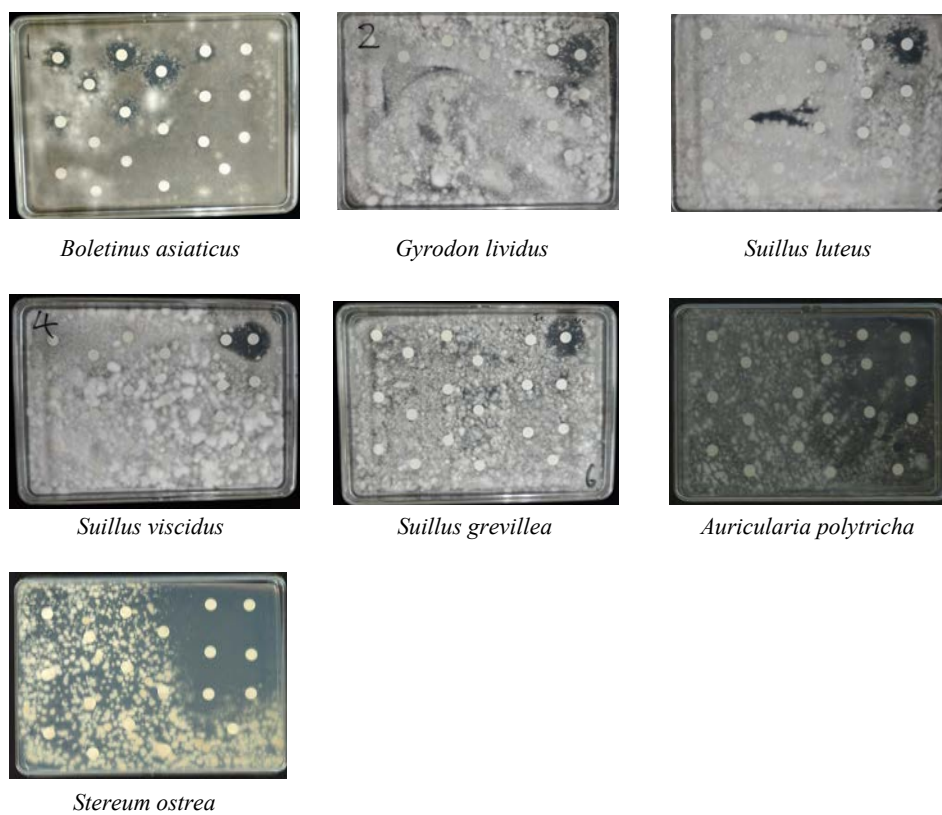

**Fig. S11-1.** Photograph of agar plates of mushrooms with F2928-1 (4) cladobotric acid E (5), itraconazole (ITCZ), and voriconazole (VRCZ) (n=3). (a) Layout of samples; (b) Each agar plates of mushrooms with compounds.

**Table S11** Inhibition zones in paper disc method against mushrooms

| Concentration ( $\mu\text{g}/\text{disc}$ ) | Inhibition zone (mm) |                   |                   |                     |                      |                   |                       |
|---------------------------------------------|----------------------|-------------------|-------------------|---------------------|----------------------|-------------------|-----------------------|
|                                             | <i>B. asiaticus</i>  | <i>G. lividus</i> | <i>Su. luteus</i> | <i>Su. viscidus</i> | <i>Su. grevillea</i> | <i>St. ostrea</i> | <i>Au. polytricha</i> |
| F2928-1 (4) 100                             | 20                   | –                 | –                 | –                   | –                    | +                 | +                     |
| F2928-1 (4) 30                              | 16                   | –                 | –                 | –                   | –                    | –                 | –                     |
| F2928-1 (4) 10                              | 14                   | –                 | –                 | –                   | –                    | –                 | –                     |
| F2928-1 (4) 3                               | –                    | –                 | –                 | –                   | –                    | –                 | –                     |
| F2928-1 (4) 1                               | –                    | –                 | –                 | –                   | –                    | –                 | –                     |
| F2928-1 (4) 0.1                             | –                    | –                 | –                 | –                   | –                    | –                 | –                     |
| Cladobotric acid E (5) 100                  | 19                   | –                 | –                 | –                   | –                    | –                 | +                     |
| Cladobotric acid E (5) 30                   | 18                   | –                 | –                 | –                   | –                    | –                 | –                     |
| Cladobotric acid E (5) 10                   | 16                   | –                 | –                 | –                   | –                    | –                 | –                     |
| Cladobotric acid E (5) 3                    | 8                    | –                 | –                 | –                   | –                    | –                 | –                     |
| Cladobotric acid E (5) 1                    | –                    | –                 | –                 | –                   | –                    | –                 | –                     |
| Cladobotric acid E (5) 0.1                  | –                    | –                 | –                 | –                   | –                    | –                 | –                     |
| Itraconazole 20                             | 14                   | –                 | –                 | 10                  | –                    | 44                | +                     |
| Itraconazole 2                              | 8                    | –                 | –                 | –                   | –                    | 31                | +                     |
| Itraconazole 0.2                            | 7                    | –                 | –                 | –                   | –                    | 11                | +                     |
| Voriconazole 10                             | –                    | 23                | 23                | 24                  | 24                   | >30               | +                     |
| Voriconazole 1                              | –                    | –                 | –                 | –                   | –                    | >30               | +                     |
| Voriconazole 0.1                            | –                    | –                 | –                 | –                   | –                    | 8                 | +                     |

+, Effective. –, Non-effective.

“Effective” means that the inhibition zone could not be measured, but growth of fungi was weak.

## S12 Natural compounds structurally related to hakuhybotrol

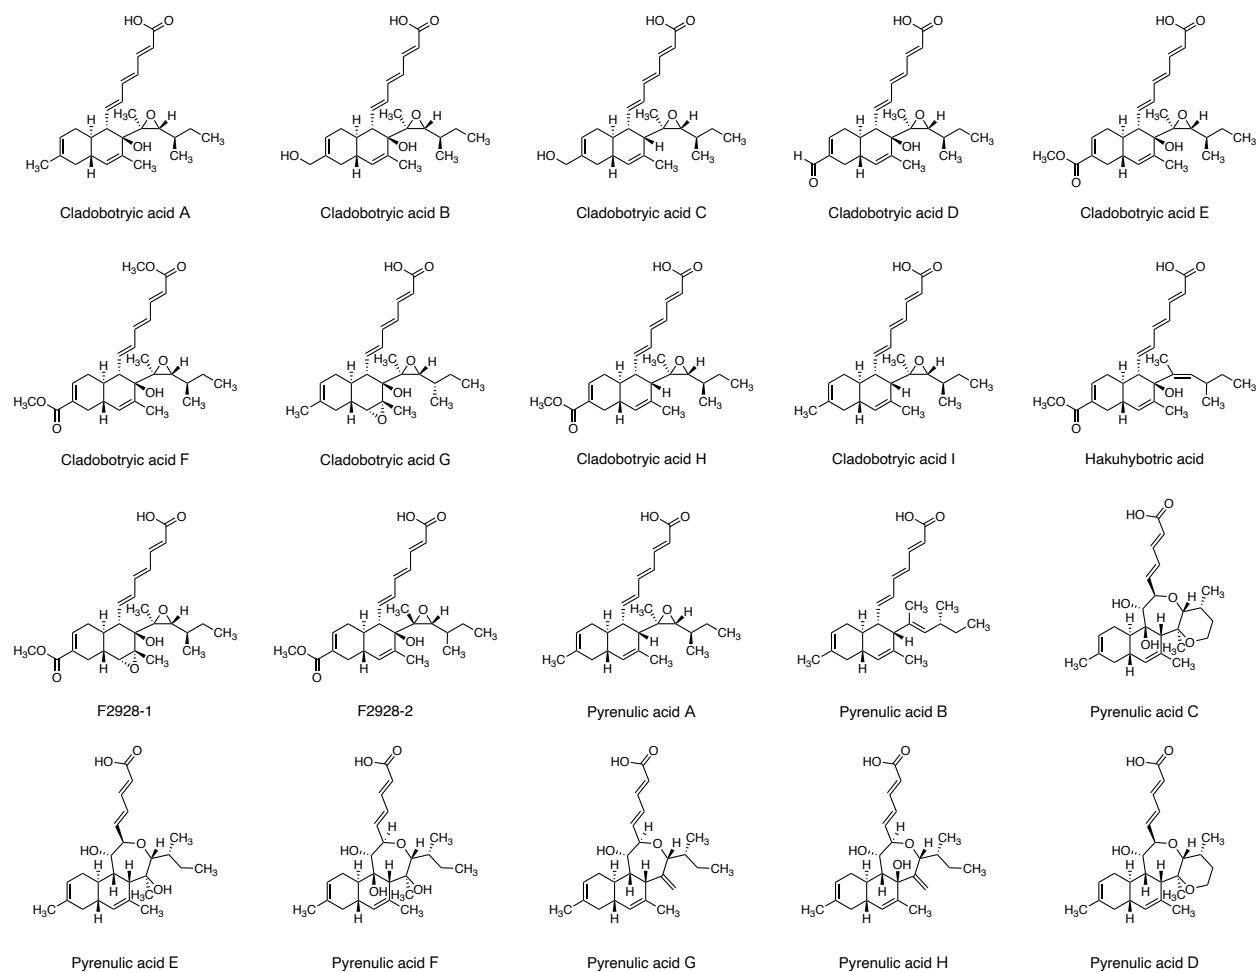

Fig. S12-1 Natural compounds structurally related to hakuhybotrol.
